# Supplementary material for: L1CAM as an E-selectin Ligand in Colon Cancer
Source: Int J Mol Sci. 2020 Nov 5;21(21):8286. doi: 10.3390/ijms21218286 (PMC7672641; doi:10.3390/ijms21218286)
Supplement: Supplementary file 1 [file ijms-21-08286-s001.xlsx]

## Sheet: Table S1
Table S1. Membrane proteins N-glycans composition of SW620Mock cells identified by MSn fragmentation analysis with identified Y- and B-ion fragments. Membrane proteins N-glycans from SW620Mock cells were released, labelled and analysed by LC-ESI-MS/MS. Mass spectrometry data were analysed using the Bruker Compass DataAnalysis 4.1 software. LC-ESI-MS/MS chromatogram analysis was performed using Br…																					441.29 (N1-PROC)	587.33 (N1F1-PROC)	644.29 (N2-PROC)	790.41 (N2F1-PROC)	806.45 (H1N2-PROC)	441.21 (N1-PROC)	587.32 (N1F1-PROC)	644.19 (N2-PROC)	790.38 (N2F1-PROC)	806.36 (H1N2-PROC)	441.23 (N1-PROC)	644.25 (N2-PROC)	968.01 (H2N2-PROC)	1130.55 (H3N2-PROC)	1292.52 (H4N2-PROC)	441.25 (N1-PROC)	587.31 (N1F1-PROC)	644.37 (N2-PROC)	790.50 (N2F1-PROC)	806.40 (H1N2-PROC)	441.27 (N1-PROC)	587.33 (N1F1-PROC)	644.17 (N2-PROC)	790.55 (N2F1-PROC)	952.63 (H1N2F1-PROC)	441.28 (N1-PROC)	644.34 (N2-PROC)	806.50 (H1N2-PROC)	968.55 (H2N2-PROC)
Peak ID	Retention time (min)	Structure	Composition				LC-ESI-MS														952.51 (H1N2F1-PROC)	968.38 (H2N2-PROC)	1130.13 (H3N2-PROC)	325.19 (H2)	366.13 (H1N1)	952.72 (H1N2F1-PROC)	968.49 (H2N2-PROC)	1114.53 (H2N2F1-PROC)	1130.62 (H3N2-PROC)	1276.63 (H3N2F1-PROC)	1333.38 (H3N3-PROC)	1454.66 (H5N2-PROC)	325.13 (H2)	366.12 (H1N1)	528.18 (H2N1)	968.63 (H2N2-PROC)	1114.51 (H2N2F1-PROC)	1130.57 (H3N2-PROC)	1171.35 (H2N3-PROC)	1276.71 (H3N2F1-PROC)	1009.51 (H2N3-PROC)	1114.42 (H2N2F1-PROC)	1130.63 (H3N2-PROC)	1155.55 (H1N3F1-PROC)	1171.56 (H2N3-PROC)	1292.64 (H4N2-PROC)	203.91 (N1)	291.98 (S1)	325.04 (H2)
			Hex (H)	HexNAc (N)	Fuc (F)	Neu5Ac (S)	[M/Z]+ calculated	[M/Z]2+ calculated	[M/Z]3+ calculated	[M/Z]+ registered	[M/Z]2+ registered	[M/Z]3+ registered	[M/Z] characteristic fragment ions (composition)								528.10 (H2N1)	649.25 (H4)	690.18 (H3N1)	811.07 (H5)	852.34 (H4N1)	203.95 (N1)	325.08 (H2)	366.14 (H1N1)	528.09 (H2N1)	690.13 (H3N1)	649.22 (H4)	690.25 (H3N1)	811.71 (H5)	852.13 (H4N1)	893.00 (H3N2)	1317.68 (H2N3F1-PROC)	1333.61 (H3N3-PROC)	1479.61 (H3N3F1-PROC)	1625.71 (H3N3F2-PROC)	1641.75 (H4N3F1-PROC)	1276.60 (H3N2F1-PROC)	1317.70 (H2N3F1-PROC)	1333.67 (H3N3-PROC)	1479.76 (H3N3F1-PROC)	1495.61 (H4N3-PROC)	454.00 (H1S1)	528.18 (H2N1)	657.21 (H1N1S1)	690.16 (H3N1)
1	8.5 (Cmpd 524)		2	2	0	0	968.45	484.73	323.49	968.46	484.73	n.d.	441.27 (N1-PROC), 644.33 (N2-PROC), 806.42 (H1N2-PROC); 325.14 (H2), 366.12 (H1N1), 528.18 (H2N1).								1014.34 (H5N1)	1176.44 (H6N1)				893.29 (H3N2)	1055.43 (H4N2)				1014.38 (H5N1)	1055.59 (H4N2)	1379.48 (H6N2)			1787.67 (H4N3F2-PROC)	204.01 (N1)	325.14 (H2)	366.08 (H1N1)	512.15 (H1N1F1)	1641.82 (H4N3F1-PROC)	204.10 (N1)	325.38 (H2)	366.11 (H1N1)	528.07 (H2N1)	819.25 (H2N1S1)	852.25 (H4N1)	893.30 (H3N2)	981.25 (H3N1S1)
2	10.4 (Cmpd 645)		2	2	1	0	1114.51	557.76	372.18	1114.5	557.76	n.d.	441.30 (N1-PROC), 587.33 (N1F1-PROC), 644.33 (N2-PROC), 790.45 (N2F1-PROC), 806.43 (H1N2-PROC), 952.46 (H1N2F1-PROC), 968.50 (H2N2-PROC); 325.16 (H2), 366.17 (H1N1), 528.21 (H2N1).																							528.06 (H2N1)	674.20 (H2N1F1)	690.51 (H3N1)	715.26 (H1N2F1)	1039.38 (H3N2F1)	569.28 (H1N2)	690.25 (H3N1)	893.62 (H3N2)	1055.38 (H4N2)	1096.38 (H3N3)	1055.48 (H4N2)	1143.44 (H4N1S1)	1217.35 (H5N2)
3	12.5 (Cmpd 779)		3	2	0	0	1130.51	565.76	377.51	1130.51	565.77	n.d.	441.28 (N1-PROC), 644.35 (N2-PROC), 806.50 (H1N2-PROC), 968.50 (H2N2-PROC); 162.98 (H1), 203.96 (N1), 325.18 (H2), 366.12 (H1N1), 487.14 (H3), 528.16 (H2N1), 690.21 (H3N1).																							1096.40 (H3N3)	1242.43 (H3N3F1)	1258.57 (H4N3)	1404.54 (H4N3F1)		1217.63 (H5N2)	1258.46 (H4N3)
4	14.5 (Cmpd 901)		3	2	1	0	1276.57	638.79	426.19	1276.58	638.83	n.d.	441.29 (N1-PROC), 587.34 (N1F1-PROC), 644.41 (N2-PROC), 790.37 (N2F1-PROC), 806.35 (H1N2-PROC), 968.50 (H2N2-PROC); 203.95 (N1), 325.06 (H2), 366.10 (H1N1), 487.13 (H3), 528.15 (H2N1), 690.21 (H3N1).
5	16.5 (Cmpd 1020)		4	2	0	0	1292.56	646.78	431.53	1292.58	646.8	n.d.	441.27 (N1-PROC), 806.30 (H1N2-PROC), 968.44 (H2N2-PROC), 366.08 (H1N1); 203.94 (N1), 325.10 (H2), 487.00 (H3), 528.14 (H2N1), 690.19 (H3N1), 852.31 (H4N1).
6	17 (Cmpd 1050)		3	3	1	0	1479.65	740.33	493.89	n.d.	740.35	n.d.	441.30 (N1-PROC), 587.33 (N1F1-PROC), 644.41 (N2-PROC), 790.47 (N2F1-PROC), 806.47 (H1N2-PROC), 952.42 (H1N2F1-PROC), 968.48 (H2N2-PROC), 1114.58 (H2N2F1-PROC), 1130.57 (H3N2-PROC), 1276.63 (H3N2F1-PROC); 204.03 (N1), 325.20 (H2), 366.09 (H1N1), 528.14 (H2N1), 569.25 (H1N2), 690.32 (H3N1), 731.36 (H2N2), 893.35 (H3N2).
7	17.3 (Cmpd 1069)		3	4	0	0	1536.67	768.84	512.89	n.d.	768.85	n.d.	441.22 (N1-PROC), 644.41 (N2-PROC), 806.38 (H1N2-PROC), 968.28 (H2N2-PROC), 1130.51 (H3N2-PROC), 1171.61 (H2N3-PROC), 1333.62 (H3N3-PROC); 325.00 (H2), 366.16 (H1N1), 731.08 (H2N2), 893.19 (H3N2), 1096.48 (H3N3).
8	18 (Cmpd 1114)		4	2	1	0	1438.62	719.81	480.21	1438.6	719.81	n.d.	441.28 (N1-PROC), 587.33 (N1F1-PROC), 644.37 (N2-PROC), 790.40 (N2F1-PROC), 806.29 (H1N2-PROC), 952.50 (H1N2F1-PROC), 968.50 (H2N2-PROC); 203.98 (N1), 325.16 (H2), 366.07 (H1N1), 487.25 (H3), 528.13 (H2N1), 690.20 (H3N1), 852.29 (H4N1).
9	18.8 (Cmpd 1161)		4	3	0	0	1495.64	748.32	499.22	1495.64	748.33	499.24	441.28 (N1-PROC), 644.51 (N2-PROC), 806.32 (H1N2-PROC), 968.47 (H2N2-PROC), 1130.54 (H3N2-PROC), 1171.63 (H2N3-PROC), 1292.63 (H4N2-PROC); 325.18 (H2), 366.08 (H1N1), 528.20 (H2N1), 649.00 (H4), 690.39 (H3N1), 731.18 (H2N2), 893.28 (H3N2), 1055.42 (H4N2).
10	19 (Cmpd 1174)		3	5	0	0	1739.75	870.38	580.59	n.d.	870.44	580.64	441.30 (N1-PROC), 644.63 (N2-PROC), 806.34 (H1N2-PROC), 1009.38 (H2N3-PROC), 1130.63 (H3N2-PROC), 1171.63 (H2N3-PROC), 1333.64 (H3N3-PROC), 1374.65 (H2N4-PROC), 1536.69 (H3N4-PROC); 366.13 (H1N1), 689.99 (H3N1), 731.00 (H2N2), 893.38 (H3N2), 934.25 (H2N3), 1096.46 (H3N3), 1299.55 (H3N4).
11	19.2 (Cmpd 1181)		3	4	1	0	1682.72	841.87	561.58	1682.71	841.88	561.58	441.20 (N1-PROC), 587.27 (N1F1-PROC), 644.38 (N2-PROC), 790.41 (N2F1-PROC), 806.12 (H1N2-PROC), 952.50 (H1N2F1-PROC), 968.58 (H2N2-PROC), 1009.50 (H2N3-PROC), 1114.54 (H2N2F1-PROC), 1130.63 (H3N2-PROC), 1155.38 (H2N3F1-PROC), 1171.65 (H2N3-PROC), 1276.58 (H3N2F1-PROC), 1317.65 (H2N3F1-PROC), 1333.68 (H3N3-PROC), 1479.70 (H3N3F1-PROC); 325.17 (H2), 366.15 (H1N1), 487.38 (H3), 528.18 (H2N1), 569.24…
12	20.1 (Cmpd 1239)		3	4	1	0	1682.72	841.87	561.58	n.d.	841.87	561.59	441.38 (N1-PROC), 587.37 (N1F1-PROC), 644.25 (N2-PROC), 790.38 (N2F1-PROC), 806.63 (H1N2-PROC), 1114.13 (H2N2F1-PROC), 1276.56 (H3N2F1-PROC), 1317.63 (H2N3F1-PROC), 1479.71 (H3N3F1-PROC); 325.13 (H2), 487.38 (H3), 690.22 (H3N1), 731.30 (H2N2), 893.35 (H3N2), 1096.50 (H3N3).
13	20.4 (Cmpd 1256)		5	2	0	0	1454.61	727.81	485.54	1454.6	727.82	n.d.	441.27 (N1-PROC), 644.36 (N2-PROC), 806.48 (H1N2-PROC), 968.38 (H2N2-PROC); 203.98 (N1), 325.09 (H2), 366.17 (H1N1), 487.13 (H3), 528.19 (H2N1), 690.18 (H3N1), 852.35 (H4N1), 1014.38 (H5N1).
14	20.3 (Cmpd 1258)		4	3	1	0	1641.7	821.35	547.9	n.d.	821.34	547.83	441.28 (N1-PROC), 587.31 (N1F1-PROC), 644.38 (N2-PROC), 790.48 (N2F1-PROC), 805.76 (H1N2-PROC), 952.45 (H1N2F1-PROC), 968.39 (H2N2-PROC), 1114.63 (H2N2F1-PROC), 1130.56 (H3N2-PROC), 1276.61 (H3N2F1-PROC); 325.13 (H2), 366.13 (H1N1), 487.50 (H3), 528.19 (H2N1), 690.25 (H3N1), 731.22 (H2N2), 852.13 (H4N1), 893.49 (H3N2), 1055.43 (H4N2).
15	20.7 (Cmpd 1273)		3	5	1	0	1885.8	943.41	629.27	n.d.	943.4	629.27	441.20 (N1-PROC), 587.34 (N1F1-PROC), 644.38 (N2-PROC), 790.63 (N2F1-PROC), 952.63 (H1N2F1-PROC), 1009.63 (H2N3-PROC), 1155.54 (H2N3F1-PROC), 1171.71 (H2N3-PROC), 1276.63 (H3N2F1-PROC), 1317.64 (H2N3F1-PROC), 1333.54 (H3N3-PROC), 1479.73 (H3N3F1-PROC), 1520.71 (H2N4F1-PROC), 1536.61 (H3N4-PROC), 1682.75 (H3N4F1-PROC); 325.06 (H2), 366.06 (H1N1), 569.14 (H1N2), 731.35 (H2N2), 1096.51 (H3N3), 1299.…
16	21.9 (Cmpd 1351)		4	4	1	0	1844.78	922.89	615.6	n.d.	922.88	615.56	441.01 (N1-PROC), 587.30 (N1F1-PROC), 644.25 (N2-PROC), 790.00 (N2F1-PROC), 806.25 (H1N2-PROC), 952.13 (H1N2F1-PROC), 968.38 (H2N2-PROC), 1009.50 (H2N3-PROC), 1114.50 (H2N2F1-PROC), 1130.75 (H3N2-PROC), 1155.63 (H2N3F1-PROC), 1171.60 (H2N3-PROC), 1276.44 (H3N2F1-PROC), 1317.62 (H2N3F1-PROC), 1333.61 (H3N3-PROC), 1374.75 (H2N4-PROC), 1479.67 (H3N3F1-PROC), 1641.71 (H4N3F1-PROC); 366.11 (H1N1), 528…
17	22.4 (Cmpd 1377)		5	3	0	0	1657.69	829.35	553.24	n.d.	829.36	n.d.	441.27 (N1-PROC), 644.34 (N2-PROC), 968.34 (H2N2-PROC), 1130.55 (H3N2-PROC), 1292.63 (H4N2-PROC), 1454.70 (H5N2-PROC); 325.01 (H2), 366.08 (H1N1), 528.51 (H2N1), 690.25 (H3N1), 731.28 (H2N2), 811.69 (H5), 852.38 (H4N1), 893.37 (H3N2), 1055.14 (H4N2), 1217.50 (H5N2).
18	23.4 (Cmpd 1437)		4	5	1	0	2047.86	1024.43	683.29	n.d.	1024.45	683.3	441.19 (N1-PROC), 587.39 (N1F1-PROC), 644.32 (N2-PROC), 790.38 (N2F1-PROC), 806.75 (H1N2-PROC), 968.43 (H2N2-PROC), 1009.56 (H2N3-PROC), 1155.50 (H2N3F1-PROC), 1171.66 (H2N3-PROC), 1276.63 (H3N2F1-PROC), 1317.65 (H2N3F1-PROC), 1333.64 (H3N3-PROC), 1479.66 (H3N3F1-PROC), 1641.74 (H4N3F1-PROC); 203.90 (N1), 366.10 (H1N1), 528.21 (H2N1), 569.01 (H1N2), 731.21 (H2N2), 893.01 (H3N2), 934.50 (H2N3), 10…
19	23.7 (Cmpd 1455)		4	3	0	1	1786.74	893.87	596.25	n.d.	893.89	596.29	441.30 (N1-PROC), 644.38 (N2-PROC), 806.34 (H1N2-PROC), 968.49 (H2N2-PROC), 1130.54 (H3N2-PROC), 1333.63 (H3N3-PROC), 1495.55 (H4N3-PROC); 325.23 (H2), 366.11 (H1N1), 528.18 (H2N1), 657.25 (H1N1S1), 690.38 (H3N1), 819.11 (H2N1S1), 981.51 (H3N1S1), 1055.41 (H4N2), 1143.63 (H4N1S1), 1184.45 (H3N2S1), 1346.18 (H4N2S1).
20	23.9 (Cmpd 1466)		6	2	0	0	1616.67	808.84	539.56	n.d.	808.86	n.d.	441.29 (N1-PROC), 644.33 (N2-PROC), 968.66 (H2N2-PROC), 1130.38 (H3N2-PROC); 325.10 (H2), 366.14 (H1N1), 487.76 (H3), 528.15 (H2N1), 649.24 (H4), 690.21 (H3N1), 852.29 (H4N1), 1014.36 (H5N1), 1176.44 (H6N1).
21	24.5 (Cmpd 1506)		5	4	0	0	1860.77	930.89	620.93	n.d.	930.9	620.96	644.50 (N2-PROC), 968.13 (H2N2-PROC), 1130.47 (H3N2-PROC), 1171.88 (H2N3-PROC), 1333.74 (H3N3-PROC), 1495.67 (H4N3-PROC); 366.11 (H1N1), 528.13 (H2N1), 690.25 (H3N1), 731.14 (H2N2), 893.18 (H3N2), 1258.50 (H4N3), 1420.38 (H5N3).
22	25.2 (Cmpd 1549)		5	5	0	0	2063.85	1032.43	688.62	n.d.	1032.42	688.63	441.20 (N1-PROC), 968.49 (H2N2-PROC), 1130.58 (H3N2-PROC), 1171.47 (H2N3-PROC), 1333.65 (H3N3-PROC), 1495.58 (H4N3-PROC); 204.03 (N1), 366.11 (H1N1), 528.05 (H2N1), 1258.55 (H4N3), 1420.63 (H5N3), 1623.77 (H5N4).
23	25.3 (Cmpd 1550)		4	3	1	1	1932.79	966.9	644.94	n.d.	966.91	644.95	441.25 (N1-PROC), 587.31 (N1F1-PROC), 644.29 (N2-PROC), 790.41 (N2F1-PROC), 806.49 (H1N2-PROC), 952.50 (H1N2F1-PROC), 1114.55 (H2N2F1-PROC), 1130.58 (H3N2-PROC), 1276.63 (H3N2F1-PROC), 1317.50 (H2N3F1-PROC), 1333.68 (H3N3-PROC), 1479.69 (H3N3F1-PROC), 1495.61 (H4N3-PROC), 1641.73 (H4N3F1-PROC), 292.05 (S1), 325.08 (H2), 366.14 (H1N1), 454.13 (H1S1), 528.19 (H2N1), 657.25 (H1N1S1), 690.25 (H3N1), …
24	25.6 (Cmpd 1568)		6	2	1	0	1762.72	881.87	588.25	n.d.	881.87	n.d.	441.29 (N1-PROC), 587.33 (N1F1-PROC), 644.29 (N2-PROC), 790.41 (N2F1-PROC), 806.45 (H1N2-PROC), 952.51 (H1N2F1-PROC), 968.38 (H2N2-PROC), 1130.13 (H3N2-PROC); 325.19 (H2), 366.13 (H1N1), 528.10 (H2N1), 649.25 (H4), 690.18 (H3N1), 811.07 (H5), 852.34 (H4N1), 1014.34 (H5N1), 1176.44 (H6N1).
25	25.8 (Cmpd 1583)		5	4	1	0	2006.83	1003.92	669.61	n.d.	1003.93	669.62	441.21 (N1-PROC), 587.32 (N1F1-PROC), 644.19 (N2-PROC), 790.38 (N2F1-PROC), 806.36 (H1N2-PROC), 952.72 (H1N2F1-PROC), 968.49 (H2N2-PROC), 1114.53 (H2N2F1-PROC), 1130.62 (H3N2-PROC), 1276.63 (H3N2F1-PROC); 203.95 (N1), 325.08 (H2), 366.14 (H1N1), 528.09 (H2N1), 690.13 (H3N1), 893.29 (H3N2), 1055.43 (H4N2).
26	25.8 (Cmpd 1585)		6	3	0	0	1819.75	910.38	607.25	n.d.	910.38	607.28	441.23 (N1-PROC), 644.25 (N2-PROC), 968.01 (H2N2-PROC), 1130.55 (H3N2-PROC), 1292.52 (H4N2-PROC), 1333.38 (H3N3-PROC), 1454.66 (H5N2-PROC); 325.13 (H2), 366.12 (H1N1), 528.18 (H2N1), 649.22 (H4), 690.25 (H3N1), 811.71 (H5), 852.13 (H4N1), 893.00 (H3N2), 1014.38 (H5N1), 1055.59 (H4N2), 1379.48 (H6N2).
27	26.1 (Cmpd 1603)		4	5	2	0	2193.91	1097.46	731.98	n.d.	1097.46	732.01	441.25 (N1-PROC), 587.31 (N1F1-PROC), 644.37 (N2-PROC), 790.50 (N2F1-PROC), 806.40 (H1N2-PROC), 968.63 (H2N2-PROC), 1114.51 (H2N2F1-PROC), 1130.57 (H3N2-PROC), 1171.35 (H2N3-PROC), 1276.71 (H3N2F1-PROC), 1317.68 (H2N3F1-PROC), 1333.61 (H3N3-PROC), 1479.61 (H3N3F1-PROC), 1625.71 (H3N3F2-PROC), 1641.75 (H4N3F1-PROC), 1787.67 (H4N3F2-PROC); 204.01 (N1), 325.14 (H2), 366.08 (H1N1), 512.15 (H1N1F1), 5…
28	26.4 (Cmpd 1619)		5	5	1	0	2209.91	1105.46	737.31	n.d.	1105.47	737.32	441.27 (N1-PROC), 587.33 (N1F1-PROC), 644.17 (N2-PROC), 790.55 (N2F1-PROC), 952.63 (H1N2F1-PROC), 1009.51 (H2N3-PROC), 1114.42 (H2N2F1-PROC), 1130.63 (H3N2-PROC), 1155.55 (H1N3F1-PROC), 1171.56 (H2N3-PROC), 1276.60 (H3N2F1-PROC), 1317.70 (H2N3F1-PROC), 1333.67 (H3N3-PROC), 1479.76 (H3N3F1-PROC), 1495.61 (H4N3-PROC), 1641.82 (H4N3F1-PROC); 204.10 (N1), 325.38 (H2), 366.11 (H1N1), 528.07 (H2N1), 56…
29	26.6 (Cmpd 1630)		5	3	0	1	1948.79	974.9	650.27	n.d.	974.9	650.27	441.28 (N1-PROC), 644.34 (N2-PROC), 806.50 (H1N2-PROC), 968.55 (H2N2-PROC), 1130.56 (H3N2-PROC), 1292.64 (H4N2-PROC); 203.91 (N1), 291.98 (S1) , 325.04 (H2), 366.10 (H1N1), 454.00 (H1S1), 528.18 (H2N1), 657.21 (H1N1S1), 690.16 (H3N1), 731.25 (H2N2), 819.25 (H2N1S1), 852.25 (H4N1), 893.30 (H3N2), 981.25 (H3N1S1), 1014.38 (H5N1), 1055.48 (H4N2), 1143.44 (H4N1S1), 1217.35 (H5N2).
30	26.8 (Cmpd 1642)		4	4	1	1	2135.87	1068.44	712.63	n.d.	1068.45	712.64	441.29 (N1-PROC), 587.28 (N1F1-PROC), 644.19 (N2-PROC), 790.26 (N2F1-PROC), 806.37 (H1N2-PROC), 952.50 (H1N2F1-PROC), 968.52 (H2N2-PROC), 1114.56 (H2N2F1-PROC), 1130.52 (H3N2-PROC), 1171.68 (H2N3-PROC), 1276.62 (H3N2F1-PROC), 1333.59 (H3N3-PROC), 1479.70 (H3N3F1-PROC), 1495.81 (H4N3-PROC), 1641.78 (H4N3F1-PROC); 203.91 (N1), 292.08 (S1), 325.07 (H2), 366.13 (H1N1), 454.13 (H1S1), 528.19 (H2N1), 6…
31	27.3 (Cmpd 1672)		7	2	0	0	1778.72	889.86	593.58	n.d.	889.87	593.4	441.28 (N1-PROC), 644.38 (N2-PROC), 806.36 (H1N2-PROC), 968.47 (H2N2-PROC), 1130.59 (H3N2-PROC); 325.06 (H2), 366.14 (H1N1), 487.09 (H3), 528.16 (H2N1), 649.10 (H4), 690.21 (H3N1), 811.19 (H5), 852.29 (H4N1), 973.15 (H6), 1014.31 (H5N1), 1176.45 (H6N1), 1338.47 (H7N1).
32	27.9 (Cmpd 1707)		4	5	1	1	2338.95	1169.98	780.32	n.d.	1170.96	780.32	441.29 (N1-PROC), 587.25 (N1F1-PROC), 644.43 (N2-PROC), 790.38 (N2F1-PROC), 806.40 (H1N2-PROC), 968.52 (H2N2-PROC), 1009.63 (H2N3-PROC), 1114.74 (H2N2F1-PROC), 1130.58 (H3N2-PROC), 1155.63 (H1N3F1-PROC), 1171.62 (H2N3-PROC), 1276.68 (H3N2F1-PROC), 1317.62 (H2N3F1-PROC), 1333.55 (H3N3-PROC), 1479.66 (H3N3F1-PROC), 1536.75 (H3N4-PROC), 1641.63 (H4N3F1-PROC), 1682.89 (H3N4F1-PROC), 1770.88 (H3N3F1S1…
33	28.1 (Cmpd 1723)		5	4	0	1	2151.87	1076.44	717.96	n.d.	1076.44	717.97	441.25 (N1-PROC), 644.30 (N2-PROC), 806.48 (H1N2-PROC), 968.46 (H2N2-PROC), 1130.56 (H3N2-PROC), 1333.51 (H3N3-PROC), 1495.65 (H4N3-PROC); 204.03 (N1), 292.04 (S1), 325.03 (H2), 366.13 (H1N1), 454.20 (H1S1), 528.19 (H2N1), 657.21 (H1N1S1), 690.24 (H3N1), 731.32 (H2N2), 819.30 (H2N1S1), 981.43 (H3N1S1), 1055.34 (H4N2), 1096.00 (H3N3), 1184.53 (H3N2S1), 1258.47 (H4N3), 1346.49 (H4N2S1), 1420.55 (H5…
34	28.7 (Cmpd 1758)		5	4	2	0	2152.89	1076.95	718.3	n.d.	1076.94	718.28	441.17 (N1-PROC), 587.38 (N1F1-PROC), 644.38 (N2-PROC), 806.38 (H1N2-PROC), 952.39 (H1N2F1-PROC), 968.26 (H2N2-PROC), 1114.51 (H2N2F1-PROC), 1130.51 (H3N2-PROC), 1276.64 (H3N2F1-PROC); 203.76 (N1), 309.24 (H1F1), 325.13 (H2), 366.08 (H1N1), 512.19 (H1N1F1), 528.13 (H2N1), 690.25 (H3N1), 893.48 (H3N2), 1014.13 (H5N1), 1201.44 (H4N2F1), 1242.75 (H3N3F1), 1363.25 (H5N2F1).
35	28.8 (Cmpd 1764)		5	6	1	0	2412.99	1207	805	n.d.	n.d.	805.01	441.35 (N1-PROC), 587.29 (N1F1-PROC), 790.38 (N2F1-PROC), 952.38 (H1N2F1-PROC), 1114.13 (H2N2F1-PROC), 1155.50 (H1N3F1-PROC), 1171.55 (H2N3-PROC), 1479.69 (H3N3F1-PROC), 1536.79 (H3N4-PROC), 1682.90 (H3N4F1-PROC), 1698.75 (H4N4-PROC), 1844.75 (H4N4F1-PROC); 366.09 (H1N1), 731.32 (H2N2), 893.76 (H3N2), 1137.63 (H2N4), 1461.5 (H4N4), 1623.63 (H5N4).
36	29 (Cmpd 1776)		5	5	2	0	2355.97	1178.49	785.99	n.d.	1178.43	785.99	441.23 (N1-PROC), 587.27 (N1F1-PROC), 644.30 (N2-PROC), 806.37 (H1N2-PROC), 952.50 (H1N2F1-PROC), 968.63 (H2N2-PROC), 1130.50 (H3N2-PROC), 1155.68 (H1N3F1-PROC), 1171.58 (H2N3-PROC), 1276.49 (H3N2F1-PROC), 1317.54 (H2N3F1-PROC), 1333.63 (H3N3-PROC), 1463.71 (H2N3F2-PROC), 1479.66 (H3N3F1-PROC), 1495.5 (H4N3-PROC), 1625.71 (H3N3F2-PROC), 1641.51 (H4N3F1-PROC), 1698.63 (H4N4-PROC), 1787.75 (H4N3F2-…
37	29.1 (Cmpd 1779)		5	5	0	1	2354.95	1177.98	785.65	n.d.	1177.92	785.66	441.30 (N1-PROC), 644.41 (N2-PROC), 968.61 (H2N2-PROC), 1009.13 (H2N3-PROC), 1130.47 (H3N2-PROC), 1171.48 (H2N3-PROC), 1333.66 (H3N3-PROC), 1495.79 (H4N3-PROC), 1624.73 (H3N3S1-PROC), 1698.72 (H4N4-PROC), 1786.76 (H4N3S1-PROC); 325.10 (H2), 366.15 (H1N1), 528.18 (H2N1), 569.16 (H1N2), 657.20 (H1N1S1), 731.26 (H2N2), 819.49 (H2N1S1), 852.25 (H4N1), 934.88 (H2N3), 981.00 (H3N1S1), 1096.38 (H3N3), 1…
38	29.4 (Cmpd 1797)		5	4	1	1	2297.93	1149.47	766.65	n.d.	1149.49	766.66	441.25 (N1-PROC), 587.29 (N1F1-PROC), 644.44 (N2-PROC), 790.23 (N2F1-PROC), 806.47 (H1N2-PROC), 952.42 (H1N2F1-PROC), 968.45 (H2N2-PROC), 1114.57 (H2N2F1-PROC), 1130.52 (H3N2-PROC), 1276.60 (H3N2F1-PROC), 1317.51 (H2N3F1-PROC), 1333.58 (H3N3-PROC), 1479.67 (H3N3F1-PROC), 1495.71 (H4N3-PROC), 1641.73 (H4N3F1-PROC); 292.03 (S1), 325.10 (H2), 366.11 (H1N1), 453.98 (H1S1), 528.14 (H2N1), 657.22 (H1N1…
39	29.6 (Cmpd 1810)		6	3	0	1	2110.84	1055.92	704.28	n.d.	1056.36	703.3	441.28 (N1-PROC), 644.34 (N2-PROC), 806.31 (H1N2-PROC), 968.51 (H2N2-PROC), 1130.64 (H3N2-PROC), 1292.55 (H4N2-PROC), 1454.71 (H5N2-PROC); 203.93 (N1), 291.99 (S1), 325.02 (H2), 366.08 (H1N1), 454.08 (H1S1), 487.25 (H3), 528.21 (H2N1), 657.20 (H1N1S1), 690.19 (H3N1), 819.25 (H2N1S1), 852.28 (H4N1), 981.44 (H3N1S1), 1014.32 (H5N1), 1055.33 (H4N2), 1143.50 (H4N1S1), 1217.32 (H5N2), 1305.01 (H5N1S1)…
40	30.2 (Cmpd 1846)		5	5	1	1	2501.01	1251.01	834.34	n.d.	1250.98	834.36	441.32 (N1-PROC), 587.22 (N1F1-PROC), 644.39 (N2-PROC), 790.25 (N2F1-PROC), 952.50 (H1N2F1-PROC), 968.54 (H2N2-PROC), 1009.50 (H2N3-PROC), 1130.41 (H3N2-PROC), 1155.88 (H1N3F1-PROC), 1171.51 (H2N3-PROC), 1276.64 (H3N2F1-PROC), 1317.69 (H2N3F1-PROC), 1333.59 (H3N3-PROC), 1479.57 (H3N3F1-PROC), 1495.63 (H4N3-PROC), 1641.50 (H4N3F1-PROC), 1682.50 (H3N4F1-PROC), 1698.88 (H4N4-PROC), 1844.89 (H4N4F1-P…
41	30.3 (Cmpd 1851)		8	2	0	0	1940.77	970.89	647.6	n.d.	970.88	n.d.	441.28 (N1-PROC), 644.32 (N2-PROC), 806.42 (H1N2-PROC), 1130.57 (H3N2-PROC), 1292.64 (H4N2-PROC), 1454.63 (H5N2-PROC); 325.10 (H2), 366.09 (H1N1), 487.18 (H3), 528.22 (H2N1), 649.15 (H4), 690.18 (H3N1), 811.16 (H5), 852.30 (H4N1), 1014.39 (H5N1), 1176.42 (H6N1), 1297.88 (H8), 1338.46 (H7N1), 1500.59 (H8N1).
42	30.7 (Cmpd 1879)		6	5	1	0	2371.96	1186.48	791.33	n.d.	n.d.	791.34	441.15 (N1-PROC), 587.32 (N1F1-PROC), 1276.63 (H3N2F1-PROC), 1317.50 (H2N3F1-PROC), 1333.72 (H3N3-PROC), 1479.76 (H3N3F1-PROC), 1495.72 (H4N3-PROC), 1641.77 (H4N3F1-PROC); 366.09 (H1N1), 528.16 (H2N1), 569.26 (H1N2), 731.27 (H2N2), 852.25 (H4N1), 893.30 (H3N2), 1055.38 (H4N2), 1420.51 (H5N3).
43	30.8 (Cmpd 1883)		6	3	1	1	2256.9	1128.95	752.97	n.d.	1128.93	752.98	441.28 (N1-PROC), 587.30 (N1F1-PROC), 644.37 (N2-PROC), 790.50 (N2F1-PROC), 806.51 (H1N2-PROC), 952.53 (H1N2F1-PROC), 968.45 (H2N2-PROC), 1130.56 (H3N2-PROC), 1276.61 (H3N2F1-PROC), 1292.43 (H4N2-PROC), 1438.67 (H4N2F1-PROC), 1454.45 (H5N2-PROC), 1600.61 (H5N2F1-PROC); 292.00 (S1), 325.10 (H2), 366.11 (H1N1), 487.25 (H3), 528.13 (H2N1), 657.20 (H1N1S1), 690.31 (H3N1), 731.38 (H2N2), 811.38 (H5), …
44	31.2 (Cmpd 1905)		5	5	3	0	2298.95	1149.98	766.99	n.d.	1149.96	766.99	441.20 (N1-PROC), 587.38 (N1F1-PROC), 644.33 (N2-PROC), 790.41 (N2F1-PROC), 806.38 (H1N2-PROC), 952.39 (H1N2F1-PROC), 968.41 (H2N2-PROC), 1114.50 (H2N2F1-PROC), 1130.52 (H3N2-PROC), 1276.61 (H3N2F1-PROC), 1641.63 (H4N3F1-PROC); 325.25 (H2), 350.04 (N1F1), 366.09 (H1N1), 487.00 (H3), 512.20 (H1N1F1), 528.17 (H2N1), 674.08 (H2N1F1), 690.25 (H3N1), 731.13 (H2N2), 893.38 (H3N2), 998.13 (H4N1F1), 1039…
45	31.4 (Cmpd 1917)		5	4	1	2	2589.02	1295.01	863.68	n.d.	1295.03	863.68	441.33 (N1-PROC), 587.33 (N1F1-PROC), 644.44 (N2-PROC), 790.44 (N2F1-PROC), 806.38 (H1N2-PROC), 952.56 (H1N2F1-PROC), 968.42 (H2N2-PROC), 1114.52 (H2N2F1-PROC), 1130.61 (H3N2-PROC), 1171.38 (H2N3-PROC), 1276.59 (H3N2F1-PROC), 1317.63 (H2N3F1-PROC), 1333.66 (H3N3-PROC), 1479.76 (H3N3F1-PROC), 1495.66 (H4N3-PROC), 1624.00 (H4N3S1-PROC), 1641.70 (H4N3F1-PROC), 1786.75 (H4N3S1-PROC), 1932.72 (H4N3F1S…
46	31.4 (Cmpd 1918)		6	6	1	0	2575.04	1288.02	859.02	n.d.	n.d.	859.03	587.25 (N1F1-PROC), 644.25 (N2-PROC), 790.38 (N2F1-PROC), 952.63 (H1N2F1-PROC), 968.47 (H2N2-PROC), 1009.76 (H1N3-PROC), 1479.50 (H3N3F1-PROC), 1536.88 (H3N4-PROC), 1641.85 (H4N3F1-PROC), 1682.68 (H3N4F1-PROC), 1844.75 (H4N4F1-PROC), 2006.96 (H5N4F1-PROC); 325.13 (H2), 366.10 (H1N1), 528.00 (H2N1), 893.22 (H3N2), 934.50 (H2N3), 1258.38 (H4N3), 1623.52 (H5N4).
47	31.6 (Cmpd 1929)		5	4	0	2	2442.96	1221.99	814.99	n.d.	1221.95	815	441.31 (N1-PROC), 644.33 (N2-PROC), 968.49 (H2N2-PROC), 1130.58 (H3N2-PROC), 1333.67 (H3N3-PROC), 1495.65 (H4N3-PROC), 1624.63 (H4N3S1-PROC), 1786.51 (H4N3S1-PROC); 292.06 (S1), 325.21 (H2), 366.13 (H1N1), 454.12 (H1S1), 528.15 (H2N1), 657.22 (H1N1S1), 690.20 (H3N1), 731.75 (H2N2), 852.75 (H4N1), 893.13 (H3N2), 1055.30 (H4N2), 1096.38 (H3N3), 1143.50 (H4N1S1), 1184.51 (H3N2S1), 1346.53 (H4N2S1), …
48	31.6 (Cmpd 1930)		5	5	3	0	2502.03	1251.52	834.68	n.d.	1251.45	834.69	441.27 (N1-PROC), 587.26 (N1F1-PROC), 790.38 (N2F1-PROC), 806.24 (H1N2-PROC), 1009.13 (H1N3-PROC), 1114.13 (H2N2F1-PROC), 1155.63 (H1N3F1-PROC), 1171.62 (H2N3-PROC), 1276.63 (H3N2F1-PROC), 1333.60 (H3N3-PROC), 1463.50 (H2N3F2-PROC), 1479.67 (H3N3F1-PROC), 1625.70 (H4N3F2-PROC), 1641.88 (H4N3F1-PROC); 325.04 (H2), 350.00 (N1F1), 366.10 (H1N1), 487.88 (H3), 512.15 (H1N1F1), 528.25 (H2N1), 731.25 (H…
49	31.6 (Cmpd 1932)		5	5	1	2	2792.1	1396.55	931.37	n.d.	n.d.	931.37	441.38 (N1-PROC), 587.30 (N1F1-PROC), 644.31 (N2-PROC), 790.43 (N2F1-PROC), 968.42 (H2N2-PROC), 1114.62 (H2N2F1-PROC), 1130.49 (H3N2-PROC), 1155.38 (H1N3F1-PROC), 1171.55 (H2N3-PROC), 1276.50 (H3N2F1-PROC), 1317.70 (H2N3F1-PROC), 1333.70 (H3N3-PROC), 1479.73 (H3N3F1-PROC), 1495.63 (H4N3-PROC), 1520.63 (H2N4F1-PROC), 1536.50 (H3N4-PROC), 1641.53 (H4N3F1-PROC), 1682.69 (H3N4F1-PROC), 1698.81 (H4N4-…
50	32 (Cmpd 1953)		5	4	2	1	2443.98	1222.5	815.33	n.d.	1222.45	815.35	441.30 (N1-PROC), 587.36 (N1F1-PROC), 644.33 (N2-PROC), 790.39 (N2F1-PROC), 806.15 (H1N2-PROC), 952.56 (H1N2F1-PROC), 968.38 (H2N2-PROC), 1114.52 (H2N2F1-PROC), 1130.55 (H3N2-PROC), 1171.51 (H2N3-PROC), 1276.60 (H3N2F1-PROC), 1479.86 (H3N3F1-PROC), 1495.64 (H4N3-PROC), 1641.82 (H4N3F1-PROC), 1786.88 (H4N3S1-PROC); 292.07 (S1), 325.00 (H2), 350.06 (N1F1), 366.12 (H1N1), 453.89 (H1S1), 512.24 (H1N1…
51	32.1 (Cmpd 1964)		6	5	3	0	2664.08	1332.54	888.7	n.d.	n.d.	888.71	441.30 (N1-PROC), 587.35 (N1F1-PROC), 644.01 (N2-PROC), 790.13 (N2F1-PROC), 952.63 (H1N2F1-PROC), 968.39 (H2N2-PROC), 1276.63 (H3N2F1-PROC), 1317.63 (H2N3F1-PROC), 1333.44 (H3N3-PROC), 1479.75 (H3N3F1-PROC), 1495.58 (H4N3-PROC), 1641.74 (H4N3F1-PROC), 1787.98 (H4N3F2-PROC), 2006.76 (H5N4F1-PROC); 366.10 (H1N1), 512.03 (H1N1F1), 1055.38 (H4N2), 1217.38 (H5N2), 1420.50 (H5N3), 1712.60 (H5N3F2).
52	32.2 (Cmpd 1966)		6	5	1	1	2663.06	1332.03	888.36	n.d.	n.d.	888.37	587.36 (N1F1-PROC), 644.13 (N2-PROC), 790.17 (N2F1-PROC), 952.50 (H1N2F1-PROC), 1114.63 (H2N2F1-PROC), 1171.38 (H2N3-PROC), 1276.38 (H3N2F1-PROC), 1317.63 (H2N3F1-PROC), 1333.57 (H3N3-PROC), 1479.64 (H3N3F1-PROC), 1495.62 (H4N3-PROC), 1641.74 (H4N3F1-PROC), 1844.75 (H4N4F1-PROC), 1932.90 (H4N3F1S1-PROC), 2006.89 (H5N4F1-PROC); 292.00 (S1), 366.08 (H1N1), 528.38 (H2N1), 657.21 (H1N1S1), 731.23 (H2…
53	32.5 (Cmpd 1983)		9	2	0	0	2102.82	1051.92	701.61	n.d.	1051.9	701.7	441.30 (N1-PROC), 644.37 (N2-PROC), 806.41 (H1N2-PROC), 968.55 (H2N2-PROC), 1130.67 (H3N2-PROC), 1292.70 (H4N2-PROC), 1454.66 (H5N2-PROC); 325.07 (H2), 366.17 (H1N1), 487.09 (H3), 528.25 (H2N1), 649.19 (H4), 690.25 (H3N1), 811.41 (H5), 852.31 (H4N1), 973.29 (H6), 1014.35 (H5N1), 1135.38 (H7), 1176.39 (H6N1), 1338.51 (H7N1), 1500.54 (H8N1), 1662.58 (H9N1).
54	32.7 (Cmpd 2000)		5	4	1	2	2589.02	1295.01	863.68	n.d.	n.d.	863.69	441.43 (N1-PROC), 587.31 (N1F1-PROC), 644.33 (N2-PROC), 790.39 (N2F1-PROC), 806.42 (H1N2-PROC), 952.55 (H1N2F1-PROC), 968.42 (H2N2-PROC), 1114.55 (H2N2F1-PROC), 1130.56 (H3N2-PROC), 1171.58 (H2N3-PROC), 1276.57 (H3N2F1-PROC), 1333.72 (H3N3-PROC), 1479.64 (H3N3F1-PROC), 1495.75 (H4N3-PROC), 1641.70 (H4N3F1-PROC), 1786.78 (H4N3S1-PROC), 1932.90 (H4N3F1S1-PROC); 292.10 (S1), 325.13 (H2), 366.12 (H1N…
55	33.1 (Cmpd 2022)		5	5	1	2	2792.1	1396.55	931.37	n.d.	n.d.	931.38	441.29 (N1-PROC), 587.30 (N1F1-PROC), 644.39 (N2-PROC), 790.50 (N2F1-PROC), 806.38 (H1N2-PROC), 968.53 (H2N2-PROC), 1009.68 (H1N3-PROC), 1114.50 (H2N2F1-PROC), 1130.50 (H3N2-PROC), 1155.42 (H1N3F1-PROC), 1171.56 (H2N3-PROC), 1276.71 (H3N2F1-PROC), 1317.59 (H2N3F1-PROC), 1333.66 (H3N3-PROC), 1479.68 (H3N3F1-PROC), 1495.75 (H4N3-PROC), 1520.88 (H2N4F1-PROC), 1698.70 (H4N4-PROC), 1770.80 (H3N3F1S1-P…
56	34.1 (Cmpd 2079)		7	6	1	0	2737.09	1369.05	913.04	n.d.	n.d.	913.03	441.38 (N1-PROC), 587.50 (N1F1-PROC), 644.38 (N2-PROC), 952.50 (H1N2F1-PROC), 968.87 (H2N2-PROC), 1114.54 (H2N2F1-PROC), 1276.50 (H3N2F1-PROC), 1333.22 (H3N3-PROC), 1479.67 (H3N3F1-PROC), 1495.78 (H4N3-PROC), 1641.63 (H4N3F1-PROC), 1844.87 (H4N4F1-PROC), 1860.63 (H5N4-PROC), 2006.89 (H5N4F1-PROC); 366.14 (H1N1), 569.38 (H1N2), 731.23 (H2N2), 852.75 (H4N1), 893.43 (H3N2), 934.38 (H2N3), 1420.38 (H…
57	34.3 (Cmpd 2095)		6	5	2	1	2809.12	1405.06	937.04	n.d.	n.d.	937.04	441.39 (N1-PROC), 587.32 (N1F1-PROC), 790.00 (N2F1-PROC), 806.00 (H1N2-PROC), 968.44 (H2N2-PROC), 1114.50 (H2N2F1-PROC), 1171.63 (H2N3-PROC), 1317.54 (H2N3F1-PROC), 1333.75 (H3N3-PROC), 1479.69 (H3N3F1-PROC), 1495.68 (H4N3-PROC), 1520.88 (H2N4F1-PROC), 1641.67 (H4N3F1-PROC), 1786.74 (H4N3S1-PROC), 1787.81 (H4N3F2-PROC), 1844.90 (H4N4F1-PROC), 1932.97 (H4N3F1S1-PROC), 1991.00 (H4N4F2-PROC), 2078.6…
58	34.4 (Cmpd 2100)		7	7	1	0	2940.17	1470.59	980.73	n.d.	n.d.	980.7	790.51 (N2F1-PROC), 806.50 (H1N2-PROC), 952.13 (H1N2F1-PROC), 1114.50 (H2N2F1-PROC), 1171.39 (H2N3-PROC), 1317.63 (H2N3F1-PROC), 1682.66 (H3N4F1-PROC), 2063.92 (H5N5-PROC), 2209.95 (H5N5F1-PROC), 2372.06 (H6N5F1-PROC); 366.11 (H1N1), 528.25 (H2N1), 852.63 (H4N1), 893.20 (H3N2), 934.88 (H2N3), 1055.41 (H4N2), 1096.50 (H3N3), 1137.5 (H2N4), 1785.25 (H6N4), 1988.75 (H6N5).
59	34.7 (Cmpd 2118)		6	5	0	2	2808.1	1404.55	936.7	n.d.	n.d.	936.68	441.38 (N1-PROC), 644.63 (N2-PROC), 806.40 (H1N2-PROC), 968.50 (H2N2-PROC), 1333.55 (H3N3-PROC), 1495.85 (H4N3-PROC), 1786.74 (H4N3S1-PROC); 366.08 (H1N1), 528.13 (H2N1), 569.88 (H1N2), 657.24 (H1N1S1), 819.14 (H2N1S1), 852.63 (H4N1), 893.38 (H3N2), 981.00 (H3N1S1), 1022.63 (H2N2S1), 1055.50 (H4N2), 1785.63 (H6N4), 1873.40 (H6N3S1), 2002.50 (H5N3S2).
60	35.2 (Cmpd 2146)		6	5	3	1	2955.17	1478.1	985.73	n.d.	n.d.	985.71	441.50 (N1-PROC), 968.50 (H2N2-PROC), 1114.50 (H2N2F1-PROC), 1171.01 (H2N3-PROC), 1276.63 (H3N2F1-PROC), 1641.63 (H4N3F1-PROC), 1786.75 (H4N3S1-PROC), 1932.76 (H4N3F1S1-PROC); 366.10 (H1N1), 512.25 (H1N1F1), 657.16 (H1N1S1), 803.38 (H1N1S1F1), 836.88 (H3N1F1), 852.63 (H4N1), 893.75 (H3N2), 934.75 (H2N3), 965.79 (H2N1F1S1), 1022.38 (H2N2S1), 1023.25 (H2N2F2), 1143.00 (H4N1S1), 1258.75 (H4N3), 1314…
61	35.2 (Cmpd 2148)		6	5	0	3	3099.19	1550.1	1033.74	n.d.	n.d.	1033.7	441.16 (N1-PROC), 644.25 (N2-PROC), 806.57 (H1N2-PROC), 968.66 (H2N2-PROC), 1130.44 (H3N2-PROC), 1171.50 (H2N3-PROC), 1333.65 (H3N3-PROC), 1495.72 (H4N3-PROC), 1624.85 (H4N3S1-PROC), 1786.72 (H4N3S1-PROC), 1860.75 (H5N4-PROC), 2151.75 (H5N4S1-PROC); 291.89 (S1), 325.13 (H2), 366.14 (H1N1), 454.13 (H1S1), 528.19 (H2N1), 657.20 (H1N1S1), 690.29 (H3N1), 819.30 (H2N1S1), 934.63 (H2N3), 1022.50 (H2N2S…
62	36.4 (Cmpd 2217)		6	5	0	3	3099.19	1550.1	1033.74	n.d.	n.d.	1033.73	441.41 (N1-PROC), 644.25 (N2-PROC), 806.34 (H1N2-PROC), 968.44 (H2N2-PROC), 1130.32 (H3N2-PROC), 1333.68 (H3N3-PROC), 1495.67 (H4N3-PROC), 1536.75 (H3N4-PROC), 1624.88 (H4N3S1-PROC), 1786.81 (H4N3S1-PROC), 1827.88 (H3N4F2-PROC), 1860.76 (H5N4-PROC), 1989.88 (H4N4S1-PROC), 2151.79 (H5N4S1-PROC), 2442.81 (H5N4S2-PROC); 292.01 (S1), 325.13 (H2), 454.25 (H1S1), 366.10 (H1N1), 528.38 (H2N1), 657.21 (H…
63	36.4 (Cmpd 2218)		7	6	1	1	3028.19	1514.6	1010.07	n.d.	n.d.	1010.06	587.38 (N1F1-PROC), 790.00 (N2F1-PROC), 1114.52 (H2N2F1-PROC), 1479.71 (H3N3F1-PROC), 1641.63 (H4N3F1-PROC), 1770.75 (H3N3F1S1-PROC), 2006.85 (H5N4F1-PROC), 2297.90 (H5N4F1S1-PROC); 366.17 (H1N1), 657.10 (H1N1S1), 731.25 (H2N2), 981.38 (H3N1S1), 1022.50 (H2N2S1), 1096.00 (H3N3), 1143.26 (H4N1S1), 1184.38 (H3N2S1), 2076.75 (H6N4S1).
64	36.5 (Cmpd 2228)		7	6	3	0	3029.21	1515.11	1010.41	n.d.	n.d.	1010.38	441.04 (N1-PROC), 1130.88 (H3N2-PROC), 1171.50 (H2N3-PROC), 1333.01 (H3N3-PROC), 1479.72 (H3N3F1-PROC), 1495.63 (H4N3-PROC), 1641.63 (H4N3F1-PROC), 2006.85 (H5N4F1-PROC), 2298.97 (H5N4F3-PROC); 366.08 (H1N1), 569.25 (H1N2), 731.50 (H2N2), 852.13 (H4N1), 861.75 (H1N2F2), 893.25 (H3N2), 998.50 (H4N1F1), 1023.13 (H2N2F2), 1055.00 (H4N2), 1347.63 (H4N2F2), 2296.91 (H7N5F1).
65	36.8 (Cmpd 2243)		7	7	1	2	3522.36	1761.69	1174.79	n.d.	n.d.	1174.63	952.63 (H1N2F1-PROC), 967.75 (H2N2-PROC), 1479.75 (H3N3F1-PROC), 1844.78 (H4N4F1-PROC), 1860.76 (H5N4-PROC), 1990.01 (H4N4S1-PROC), 2135.63 (H4N4F1S1-PROC), 2209.88 (H5N5F1-PROC), 2501 (H5N5F1S1-PROC); 292.00 (S1), 366.18 (H1N1), 569.50 (H1N2), 656.95 (H1N1S1), 731.38 (H2N2), 819.50 (H2N1S1), 981.38 (H3N1S1), 1022.63 (H2N2S1), 1055.50 (H4N2).
66	36.8 (Cmpd 2244)		6	5	3	1	2955.17	1478.1	985.73	n.d.	n.d.	985.7	441.38 (N1-PROC), 587.34 (N1F1-PROC), 790.13 (N2F1-PROC), 952.25 (H1N2F1-PROC), 1114.51 (H2N2F1-PROC), 1479.63 (H3N3F1-PROC), 1641.73 (H4N3F1-PROC), 1787.52 (H4N3F2-PROC), 1932.83 (H4N3F1S1-PROC), 2226.13 (H6N5-PROC); 350.13 (N1F1), 366.04 (H1N1), 512.17 (H1N1F1), 528.25 (H2N1), 657.15 (H1N1S1), 674.13 (H2N1F1), 803.16 (H1N1F1S1), 819.38 (H2N1S1), 965.52 (H2N1F1S1), 1039.88 (H3N2F1), 1184.38 (H3N…
67	37.6 (Cmpd 2294)		7	6	1	2	3319.29	1660.15	1107.1	n.d.	n.d.	1107.08	587.25 (N1F1-PROC), 790.38 (N2F1-PROC), 1171.38 (H2N3-PROC), 1333.13 (H3N3-PROC), 1479.66 (H3N3F1-PROC), 1860.79 (H5N4-PROC), 2006.88 (H5N4F1-PROC), 2151.84 (H5N4S1-PROC), 2297.94 (H5N4F1S1-PROC); 366.12 (H1N1), 454.75 (H1S1), 569.25 (H1N2), 657.07 (H1N1S1), 819.25 (H2N1S1), 1184.47 (H3N2S1), 1475.50 (H3N2S2).
68	38.1 (Cmpd 2320)		7	7	1	2	3522.36	1761.69	1174.79	n.d.	n.d.	1174.77	441.25 (N1-PROC), 587.41 (N1F1-PROC), 952.26 (H1N2F1-PROC), 968.50 (H2N2-PROC), 1479.64 (H3N3F1-PROC), 1844.75 (H4N4F1-PROC), 1990.05 (H4N4S1-PROC) 2136.01 (H4N4F1S1-PROC), 2151.88 (H5N4S1-PROC), 2210.01 (H5N5F1-PROC), 2354.88 (H5N5S1-PROC), 2500.88 (H5N5F1S1-PROC); 292.00 (S1), 366.15 (H1N1), 454.06 (H1S1), 657.29 (H1N1S1), 819.62 (H2N1S1), 893.39 (H3N2), 1022.63 (H2N2S1), 1137.00 (H2N4), 1508.5…
69	38.8 (Cmpd 2363)		7	6	1	3	3610.38	1805.69	1204.13	n.d.	n.d.	1204.74	587.30 (N1F1-PROC), 806.38 (H1N2-PROC), 952.63 (H1N2F1-PROC), 968.38 (H2N2-PROC), 1114.5 (H2N2F1-PROC), 1317.76 (H2N3F1-PROC), 1333 (H3N3-PROC), 1495.75 (H4N3-PROC), 1641.86 (H4N3F1-PROC), 1770.88 (H3N3F1S1-PROC), 1932.76 (H4N3F1S1-PROC), 2226.01 (H6N5-PROC), 2297.75 (H5N4F1S1-PROC); 292.02 (S1), 366.1 (H1N1), 454 (H1S1), 528.25 (H2N1), 657.25 (H1N1S1), 852.25 (H4N1), 981.66 (H3N1S1), 1022.38 (H2…
[truncated: 158 more columns]

## Sheet: Table S2
Table S2. Membrane proteins N-glycans composition of SW620FUT6 cells identified by MSn fragmentation analysis with identified Y- and B-ion fragments. Membrane proteins N-glycans from SW620FUT6 cells were released, labelled and analysed by LC-ESI-MS/MS. Mass spectrometry data were analysed using the Bruker Compass DataAnalysis 4.1 software. LC-ESI-MS/MS chromatogram analysis was performed using Br…
Peak ID	Retention time (min)	Structure	Composition				LC-ESI-MS
			Hex (H)	HexNAc (N)	Fuc (F)	Neu5Ac (S)	[M/Z]+ calculated	[M/Z]2+ calculated	[M/Z]3+ calculated	[M/Z]+ registered	[M/Z]2+ registered	[M/Z]3+ registered	[M/Z] characteristic fragment ions (composition)
1	8.6 (Cmpd 522)		2	2	0	0	968.45	484.73	323.49	967.44	484.73	n.d.	441.32 (N1-PROC), 644.34 (N2-PROC), 806.44 (H1N2-PROC); 325.15 (H2), 366.10 (H1N1), 528.24 (H2N1).
2	10.4 (Cmpd 638)		2	2	1	0	1114.51	557.76	372.18	1114.54	557.77	n.d.	441.30 (N1-PROC), 587.34 (N1F1-PROC), 644.34 (N2-PROC), 790.43 (N2F1-PROC), 806.41 (H1N2-PROC), 952.52 (H1N2F1-PROC), 968.48 (H2N2-PROC); 325.13 (H2), 366.17 (H1N1), 528.33 (H2N1).
3	12.5 (Cmpd 776)		3	2	0	0	1130.51	565.76	377.51	1130.52	565.77	n.d.	441.31 (N1-PROC), 644.34 (N2-PROC); 162.98 (H1), 203.98 (N1), 325.22 (H2), 366.14 (H1N1), 487.63 (H3), 528.19 (H2N1), 690.22 (H3N1).
4	14.4 (Cmpd 891)		3	2	1	0	1276.57	638.79	426.19	1276.58	638.79	n.d.	441.28 (N1-PROC), 587.32 (N1F1-PROC), 644.26 (N2-PROC), 806.31 (H1N2-PROC); 203.97 (N1), 325.18 (H2), 366.16 (H1N1), 528.20 (H2N1), 690.20 (H3N1).
5	16.4 (Cmpd 1008)		4	2	0	0	1292.56	646.78	431.53	1292.58	646.79	n.d.	441.30 (N1-PROC), 806.41 (H1N2-PROC), 968.61 (H2N2-PROC); 203.94 (N1), 325.13 (H2), 366.14 (H1N1), 486.99 (H3), 528.17 (H2N1), 690.23 (H3N1), 852.31 (H4N1).
6	16.9 (Cmpd 1038)		3	3	1	0	1479.65	740.33	493.89	n.d.	740.35	n.d.	441.29 (N1-PROC), 587.32 (N1F1-PROC), 644.32 (N2-PROC), 790.47 (N2F1-PROC), 806.47 (H1N2-PROC), 952.53 (H1N2F1-PROC), 968.48 (H2N2-PROC), 1114.61 (H2N2F1-PROC), 1130.59 (H3N2-PROC), 1276.65 (H3N2F1-PROC); 203.97 (N1), 325.19 (H2), 366.09 (H1N1), 487.25 (H3), 528.16 (H2N1), 690.25 (H3N1), 731.33 (H2N2), 893.25 (H3N2).
7	17.3 (Cmpd 1059)		3	4	0	0	1536.67	768.84	512.89	n.d.	768.87	n.d.	441.34 (N1-PROC), 644.32 (N2-PROC), 806.45 (H1N2-PROC), 968.43 (H2N2-PROC), 1130.50 (H3N2-PROC), 1171.56 (H2N3-PROC), 1333.64 (H3N3-PROC); 366.18 (H1N1), 528.25 (H2N1), 731.16 (H2N2), 893.38 (H3N2), 1096.40 (H3N3).
8	17.9 (Cmpd 1100)		4	2	1	0	1438.62	719.81	480.21	n.d.	719.84	n.d.	441.29 (N1-PROC), 587.34 (N1F1-PROC), 644.28 (N2-PROC), 790.43 (N2F1-PROC), 806.57 (H1N2-PROC), 952.50 (H1N2F1-PROC), 1130.50 (H3N2-PROC); 203.93 (N1), 325.10 (H2), 366.14 (H1N1), 528.20 (H2N1), 690.23 (H3N1), 852.29 (H4N1).
9	18.7 (Cmpd 1149)		4	3	0	0	1495.64	748.32	499.22	n.d.	748.32	n.d.	441.29 (N1-PROC), 644.38 (N2-PROC), 806.33 (H1N2-PROC), 968.49 (H2N2-PROC), 1130.58 (H3N2-PROC), 1292.62 (H4N2-PROC); 325.09 (H2), 366.09 (H1N1), 528.16 (H2N1), 649.01 (H4), 690.08 (H3N1), 731.37 (H2N2), 852.38 (H4N1), 893.22 (H3N2), 1055.45 (H4N2).
10	19.1 (Cmpd 1172)		3	4	1	0	1682.72	841.87	561.58	n.d.	841.88	n.d.	441.30 (N1-PROC), 587.41 (N1F1-PROC), 644.74 (N2-PROC), 790.26 (N2F1-PROC), 806.88 (H1N2-PROC), 968.57 (H2N2-PROC), 1009.13 (H1N3-PROC), 1114.56 (H2N2F1-PROC), 1130.68 (H3N2-PROC), 1171.66 (H2N3-PROC), 1276.60 (H3N2F1-PROC), 1317.62 (H2N3F1-PROC), 1333.59 (H3N3-PROC), 1479.74 (H3N3F1-PROC); 325.00 (H2), 366.07 (H1N1), 528.25 (H2N1), 569.48 (H1N2), 690.36 (H3N1), 893.22 (H3N2), 1096.41 (H3N3).
11	20 (Cmpd 1225)		3	4	1	0	1682.72	841.87	561.58	n.d.	841.87	n.d.	441.42 (N1-PROC), 587.26 (N1F1-PROC), 644.13 (N2-PROC), 806.01 (H1N2-PROC), 968.38 (H2N2-PROC), 1114.50 (H2N2F1-PROC), 1130.57 (H3N2-PROC), 1276.54 (H3N2F1-PROC), 1317.68 (H2N3F1-PROC), 1333.57 (H3N3-PROC), 1479.71 (H3N3F1-PROC); 366.13 (H1N1), 690.63 (H3N1), 731.19 (H2N2), 893.35 (H3N2), 1096.33 (H3N3).
12	20.3 (Cmpd 1247)		5	2	0	0	1454.61	727.81	485.54	1454.59	727.83	n.d.	441.29 (N1-PROC), 644.37 (N2-PROC), 806.41 (H1N2-PROC), 968.42 (H2N2-PROC); 203.97 (N1), 325.11 (H2), 366.15 (H1N1), 487.25 (H3), 528.20 (H2N1), 649.17 (H4), 690.21 (H3N1), 852.28 (H4N1), 1014.39 (H5N1).
13	20.4 (Cmpd 1249)		4	3	1	0	1641.7	821.35	547.9	n.d.	821.35	n.d.	441.28 (N1-PROC), 587.26 (N1F1-PROC), 644.49 (N2-PROC), 790.48 (N2F1-PROC), 806.35 (H1N2-PROC), 952.58 (H1N2F1-PROC), 968.49 (H2N2-PROC), 1114.55 (H2N2F1-PROC), 1130.59 (H3N2-PROC), 1276.64 (H3N2F1-PROC); 325.13 (H2), 366.11 (H1N1), 528.20 (H2N1), 690.31 (H3N1), 731.25 (H2N2), 852.38 (H4N1), 893.46 (H3N2), 1055.42 (H4N2).
14	21.2 (Cmpd 1302)		4	4	0	0	1698.72	849.86	566.91	n.d.	849.85	n.d.	441.38 (N1-PROC), 806.26 (H1N2-PROC), 968.43 (H2N2-PROC), 1130.63 (H3N2-PROC), 1333.65 (H3N3-PROC), 1495.74 (H4N3-PROC); 366.07 (H1N1), 528.25 (H2N1), 690.25 (H3N1), 731.38 (H2N2), 1096.49 (H3N3).
15	21.9 (Cmpd 1340)		3	5	1	0	1885.8	943.41	629.27	n.d.	943.42	n.d.	441.25 (N1-PROC), 587.34 (N1F1-PROC), 644.25 (N2-PROC), 968.50 (H2N2-PROC), 1009.50 (H1N3-PROC), 1114.57 (H2N2F1-PROC), 1130.38 (H3N2-PROC), 1171.63 (H2N3-PROC), 1276.66 (H3N2F1-PROC), 1317.62 (H2N3F1-PROC), 1333.71 (H3N3-PROC), 1479.67 (H3N3F1-PROC), 1520.75 (H2N4F1-PROC), 1536.73 (H3N4-PROC), 1682.79 (H3N4F1-PROC); 366.38 (H1N1), 487.15 (H3), 528.21 (H2N1), 569.75 (H1N2), 690.25 (H3N1), 893.00 …
16	21.9 (Cmpd 1345)		4	4	1	0	1844.78	922.89	615.6	n.d.	922.89	615.56	441.30 (N1-PROC), 587.28 (N1F1-PROC), 790.42 (N2F1-PROC), 806.00 (H1N2-PROC), 1114.63 (H2N2F1-PROC), 1155.46 (H1N3F1-PROC), 1276.59 (H3N2F1-PROC), 1317.60 (H2N3F1-PROC), 1333.51 (H3N3-PROC), 1479.69 (H3N3F1-PROC), 1641.78 (H4N3F1-PROC); 325.13 (H2), 366.13 (H1N1), 528.50 (H2N1), 690.75 (H3N1), 852.38 (H4N1), 893.68 (H3N2), 1096.38 (H3N3), 1258.53 (H4N3).
17	22 (Cmpd 1346)		5	2	1	0	1600.67	800.84	534.23	n.d.	800.85	n.d.	441.31 (N1-PROC), 587.34 (N1F1-PROC), 644.32 (N2-PROC), 790.47 (N2F1-PROC), 968.39 (H2N2-PROC); 325.17 (H2), 366.09 (H1N1), 487.11 (H3), 528.19 (H2N1), 649.25 (H4), 690.21 (H3N1), 852.30 (H4N1), 1014.36 (H5N1).
18	22.3 (Cmpd 1367)		5	3	0	0	1657.69	829.35	553.24	n.d.	829.36	n.d.	441.37 (N1-PROC), 644.44 (N2-PROC), 806.30 (H1N2-PROC), 968.49 (H2N2-PROC), 1130.54 (H3N2-PROC), 1292.65 (H4N2-PROC), 1454.57 (H5N2-PROC); 366.13 (H1N1), 528.11 (H2N1), 690.13 (H3N1), 731.09 (H2N2), 811.38 (H5), 852.75 (H4N1), 1055.40 (H4N2), 1217.42 (H5N2).
19	22.9 (Cmpd 1400)		4	3	1	1	1932.79	966.9	644.94	n.d.	966.91	644.94	441.25 (N1-PROC), 587.41 (N1F1-PROC), 790.44 (N2F1-PROC), 806.45 (H1N2-PROC), 952.50 (H1N2F1-PROC), 1114.57 (H2N2F1-PROC), 1130.62 (H3N2-PROC), 1276.61 (H3N2F1-PROC), 1317.63 (H2N3F1-PROC), 1479.75 (H3N3F1-PROC), 1641.88 (H4N3F1-PROC), 1786.75 (H4N3S1-PROC); 292.05 (S1), 366.14 (H1N1), 454.07 (H1S1), 528.24 (H2N1), 657.22 (H1N1S1), 819.35 (H2N1S1), 852.25 (H4N1), 893.51 (H3N2), 1055.41 (H4N2), 13…
20	23.3 (Cmpd 1425)		3	6	1	0	2088.88	1044.95	696.97	n.d.	1044.95	696.96	441.24 (N1-PROC), 587.24 (N1F1-PROC), 644.50 (N2-PROC), 1114.57 (H2N2F1-PROC), 1171.63 (H2N3-PROC), 1276.51 (H3N2F1-PROC), 1317.64 (H2N3F1-PROC), 1333.60 (H3N3-PROC), 1479.69 (H3N3F1-PROC), 1520.75 (H2N4F1-PROC), 1536.76 (H3N4-PROC), 1682.69 (H3N4F1-PROC); 203.96 (N1), 528.14 (H2N1), 569.19 (H1N2), 934.38 (H2N3), 1096.46 (H3N3), 1299.40 (H3N4), 1502.63 (H3N5).
21	23.3 (Cmpd 1428)		4	5	1	0	2047.86	1024.43	683.29	n.d.	1024.46	683.3	587.27 (N1F1-PROC), 644.50 (N2-PROC), 790.50 (N2F1-PROC), 1114.76 (H2N2F1-PROC), 1171.50 (H2N3-PROC), 1317.66 (H2N3F1-PROC), 1374.76 (H2N4-PROC), 1479.71 (H3N3F1-PROC), 1520.88 (H2N4F1-PROC), 1536.50 (H3N4-PROC), 1682.78 (H3N4F1-PROC), 1844.83 (H4N4F1-PROC); 366.13 (H1N1), 528.20 (H2N1), 893.02 (H3N2), 1258.38 (H4N3).
22	23.6 (Cmpd 1443)		4	3	0	1	1786.74	893.87	596.25	n.d.	893.88	n.d.	441.34 (N1-PROC), 644.31 (N2-PROC), 806.44 (H1N2-PROC), 968.50 (H2N2-PROC), 1130.56 (H3N2-PROC), 1333.50 (H3N3-PROC), 1495.63 (H4N3-PROC); 292.00 (S1), 324.99 (H2), 366.16 (H1N1), 454.23 (H1S1), 528.06 (H2N1), 657.21 (H1N1S1), 690.13 (H3N1), 731.21 (H2N2), 819.28 (H2N1S1), 981.00 (H3N1S1), 1184.38 (H3N2S1), 1346.46 (H4N2S1).
23	23.8 (Cmpd 1457)		6	2	0	0	1616.67	808.84	539.56	1616.63	808.86	n.d.	441.29 (N1-PROC), 644.34 (N2-PROC), 968.48 (H2N2-PROC), 1292.62 (H4N2-PROC); 325.14 (H2), 366.11 (H1N1), 487.09 (H3), 528.13 (H2N1), 649.63 (H4), 690.21 (H3N1), 852.33 (H4N1), 1014.46 (H5N1), 1176.44 (H6N1).
24	24.3 (Cmpd 1490)		5	4	0	0	1860.77	930.89	620.93	n.d.	930.89	620.94	441.34 (N1-PROC), 644.38 (N2-PROC), 968.13 (H2N2-PROC), 1130.47 (H3N2-PROC), 1333.66 (H3N3-PROC), 1495.69 (H4N3-PROC); 325.29 (H2), 366.13 (H1N1), 528.11 (H2N1), 569.13 (H1N2), 690.25 (H3N1), 731.20 (H2N2), 893.25 (H3N2), 934.76 (H2N3), 1055.27 (H4N2), 1217.51 (H5N2), 1420.56 (H5N3).
25	25 (Cmpd 1529)		5	5	0	0	2063.85	1032.43	688.62	n.d.	1032.45	688.64	441.32 (N1-PROC), 644.25 (N2-PROC), 806.46 (H1N2-PROC), 968.38 (H2N2-PROC), 1009.64 (H1N3-PROC), 1171.59 (H2N3-PROC), 1333.64 (H3N3-PROC), 1495.59 (H4N3-PROC); 203.94 (N1), 325.08 (H2), 366.10 (H1N1), 528.25 (H2N1), 731.28 (H2N2), 893.25 (H3N2), 1055.33 (H4N2), 1096.62 (H3N3), 1258.46 (H4N3), 1420.57 (H5N3).
26	25.2 (Cmpd 1540)		4	3	1	1	1932.79	966.9	644.94	n.d.	966.92	644.95	441.24 (N1-PROC), 587.37 (N1F1-PROC), 644.35 (N2-PROC), 790.42 (N2F1-PROC), 806.37 (H1N2-PROC), 952.47 (H1N2F1-PROC), 1114.52 (H2N2F1-PROC), 1130.54 (H3N2-PROC), 1276.62 (H3N2F1-PROC), 1333.65 (H3N3-PROC), 1479.53 (H3N3F1-PROC), 1495.51 (H4N3-PROC), 1641.96 (H4N3F1-PROC); 292.00 (S1), 325.12 (H2), 366.13 (H1N1), 454.21 (H1S1), 528.10 (H2N1), 657.22 (H1N1S1), 690.13 (H3N1), 731.75 (H2N2), 819.25 (…
27	25.4 (Cmpd 1551)		4	4	0	1	1989.81	995.41	663.94	n.d.	995.43	n.d.	441.50 (N1-PROC), 644.25 (N2-PROC), 806.63 (H1N2-PROC), 968.70 (H2N2-PROC), 1130.43 (H3N2-PROC), 1171.55 (H2N3-PROC), 1333.65 (H3N3-PROC), 1495.51 (H4N3-PROC), 1624.77 (H3N3S1-PROC); 292.00 (S1), 366.00 (H1N1), 528.13 (H2N1), 657.25 (H1N1S1), 819.04 (H2N1S1), 893.83 (H3N2), 981.50 (H3N1S1), 1055.63 (H4N2), 1258.77 (H4N3), 1549.51 (H4N3S1).
28	25.6 (Cmpd 1562)		6	2	1	0	1762.72	881.87	588.25	n.d.	881.85	n.d.	441.29 (N1-PROC), 644.38 (N2-PROC), 806.75 (H1N2-PROC), 968.64 (H2N2-PROC); 325.08 (H2), 366.14 (H1N1), 487.37 (H3), 528.09 (H2N1), 649.13 (H4), 690.34 (H3N1), 811.25 (H5), 852.26 (H4N1), 973.00 (H6), 1014.31 (H5N1), 1176.56 (H6N1).
29	25.7 (Cmpd 1571)		5	4	1	0	2006.83	1003.92	669.61	n.d.	1003.94	669.63	441.28 (N1-PROC), 587.34 (N1F1-PROC), 644.36 (N2-PROC), 790.35 (N2F1-PROC), 806.35 (H1N2-PROC), 952.42 (H1N2F1-PROC), 968.51 (H2N2-PROC), 1114.59 (H2N2F1-PROC), 1130.56 (H3N2-PROC), 1276.59 (H3N2F1-PROC), 1333.71 (H3N3-PROC), 1495.50 (H4N3-PROC); 203.98 (N1), 325.14 (H2), 366.11 (H1N1), 528.16 (H2N1), 690.19 (H3N1), 731.26 (H2N2), 852.25 (H4N1), 893.27 (H3N2), 1055.40 (H4N2), 1258.50 (H4N3).
30	25.7 (Cmpd 1572)		6	3	0	0	1819.75	910.38	607.25	n.d.	910.39	n.d.	441.20 (N1-PROC), 644.38 (N2-PROC), 806.58 (H1N2-PROC), 968.52 (H2N2-PROC), 1130.57 (H3N2-PROC), 1292.57 (H4N2-PROC), 1454.69 (H5N2-PROC); 325.01 (H2), 366.12 (H1N1), 528.17 (H2N1), 690.32 (H3N1), 811.71 (H5), 852.26 (H4N1), 893.41 (H3N2), 1014.02 (H5N1), 1217.63 (H5N2), 1379.58 (H6N2).
31	26.3 (Cmpd 1606)		5	5	1	0	2209.91	1105.46	737.31	n.d.	1105.47	737.32	441.24 (N1-PROC), 587.34 (N1F1-PROC), 644.33 (N2-PROC), 790.33 (N2F1-PROC), 952.33 (H2N2-PROC), 968.63 (H2N2-PROC), 1009.64 (H1N3-PROC), 1114.55 (H2N2F1-PROC), 1130.63 (H3N2-PROC), 1155.50 (H1N3F1-PROC), 1171.68 (H2N3-PROC), 1276.60 (H3N2F1-PROC), 1317.67 (H2N3F1-PROC), 1333.61 (H3N3-PROC), 1479.72 (H3N3F1-PROC), 1495.52 (H4N3-PROC), 1641.68 (H4N3F1-PROC); 203.96 (N1), 366.12 (H1N1), 528.20 (H2N1…
32	26.5 (Cmpd 1619)		5	3	0	1	1948.79	974.9	650.27	n.d.	974.91	650.28	441.34 (N1-PROC), 644.38 (N2-PROC), 806.42 (H1N2-PROC), 968.42 (H2N2-PROC), 1130.59 (H3N2-PROC), 1292.61 (H4N2-PROC), 1333.88 (H3N3-PROC), 1495.69 (H4N3-PROC), 1657.88 (H5N3-PROC); 325.07 (H2), 366.12 (H1N1), 657.20 (H1N1S1), 731.37 (H2N2), 819.33 (H2N1S1), 893.85 (H3N2), 1055.37 (H4N2), 1143.50 (H4N1S1), 1184.60 (H3N2S1), 1217.48 (H5N2), 1305.38 (H5N1S1), 1346.58 (H4N2S1), 1508.47 (H5N2S1).
33	27.2 (Cmpd 1663)		7	2	0	0	1778.72	889.86	593.58	n.d.	889.86	n.d.	441.27 (N1-PROC), 644.35 (N2-PROC), 806.42 (H1N2-PROC), 968.52 (H2N2-PROC), 1130.52 (H3N2-PROC), 1292.75 (H4N2-PROC); 325.11 (H2), 366.17 (H1N1), 486.90 (H3), 528.17 (H2N1), 649.11 (H4), 690.23 (H3N1), 811.09 (H5), 852.29 (H4N1), 973.18 (H6), 1014.39 (H5N1), 1135.38 (H7), 1176.44 (H6N1), 1338.51 (H7N1).
34	27.7 (Cmpd 1691)		5	4	1	1	2297.93	1149.47	766.65	n.d.	1149.48	766.64	441.34 (N1-PROC), 644.13 (N2-PROC), 806.45 (H1N2-PROC), 968.42 (H2N2-PROC), 1130.64 (H3N2-PROC), 1317.76 (H2N3F1-PROC), 1333.75 (H3N3-PROC), 1479.88 (H3N3F1-PROC), 1641.70 (H4N3F1-PROC); 292.07 (S1), 325.13 (H2), 350.0 (N1F1), 366.12 (H1N1), 454.10 (H1S1), 512.18 (H1N1F1), 528.09 (H2N1), 657.21 (H1N1S1), 690.38 (H3N1), 731.13 (H2N2), 803.47 (H1N1S1F1), 819.45 (H2N1S1), 852.41 (H4N1), 893.25 (H3N2…
35	28 (Cmpd 1711)		5	4	0	1	2151.87	1076.44	717.96	n.d.	1076.42	717.98	441.30 (N1-PROC), 644.34 (N2-PROC), 806.43 (H1N2-PROC), 968.45 (H2N2-PROC), 1130.57 (H3N2-PROC), 1171.43 (H2N3-PROC), 1333.60 (H3N3-PROC), 1495.70 (H4N3-PROC); 203.98 (N1), 292.08 (S1), 325.17 (H2), 366.14 (H1N1), 528.17 (H2N1), 657.22 (H1N1S1), 690.19 (H3N1), 731.38 (H2N2), 819.31 (H2N1S1), 893.36 (H3N2), 981.27 (H3N1S1), 1055.38 (H4N2), 1143.50 (H4N1S1), 1184.47 (H3N2S1), 1217.50 (H5N2), 1346.4…
36	28.4 (Cmpd 1737)		6	3	1	0	1965.8	983.41	655.94	n.d.	983.42	655.97	441.30 (N1-PROC), 952.26 (H1N2F1-PROC), 968.54 (H2N2-PROC), 1130.60 (H3N2-PROC), 1171.13 (H2N3-PROC), 1292.67 (H4N2-PROC), 1438.75 (H4N2F1-PROC), 1454.60 (H5N2-PROC), 1600.77 (H5N2F1-PROC); 366.08 (H1N1), 528.31 (H2N1), 811.88 (H5), 893.38 (H3N2).
37	28.6 (Cmpd 1738)		5	4	2	0	2152.89	1076.95	718.3	n.d.	1076.96	718.31	441.29 (N1-PROC), 587.32 (N1F1-PROC), 790.38 (N2F1-PROC), 806.51 (H1N2-PROC), 952.53 (H1N2F1-PROC), 968.67 (H2N2-PROC), 1114.57 (H2N2F1-PROC), 1130.60 (H3N2-PROC), 1276.61 (H3N2F1-PROC), 1333.75 (H3N3-PROC), 1625.63 (H3N3F2-PROC), 1641.75 (H4N3F1-PROC); 203.90 (N1), 309.35 (H1F1), 366.12 (H1N1), 512.15 (H1N1F1), 528.22 (H2N1), 674.34 (H2N1F1), 690.28 (H3N1), 731.36 (H2N2), 836.25 (H3N1F1), 893.19…
38	28.7 (Cmpd 1755)		5	6	1	0	2412.99	1207	805	n.d.	n.d.	805.02	441.13 (N1-PROC), 587.40 (N1F1-PROC), 1130.63 (H3N2-PROC), 1317.53 (H2N3F1-PROC), 1479.70 (H3N3F1-PROC), 1536.76 (H3N4-PROC), 1682.78 (H3N4F1-PROC), 1698.76 (H4N4-PROC), 1844.73 (H4N4F1-PROC); 366.19 (H1N1), 487.50 (H3), 731.25 (H2N2), 1096.63 (H3N3), 1461.56 (H4N4).
39	29 (Cmpd 1768)		5	5	0	1	2354.95	1177.98	785.65	n.d.	1177.96	785.66	441.24 (N1-PROC), 644.17 (N2-PROC), 806.32 (H1N2-PROC), 968.50 (H2N2-PROC), 1130.63 (H3N2-PROC), 1171.59 (H2N3-PROC), 1333.70 (H3N3-PROC), 1495.62 (H4N3-PROC), 1536.75 (H3N4-PROC), 1624.71 (H3N3S1-PROC), 1698.68 (H4N4-PROC); 291.94 (S1), 325.09 (H2), 366.11 (H1N1), 528.07 (H2N1), 569.75 (H1N2), 657.16 (H1N1S1), 690.22 (H3N1), 731.88 (H2N2), 819.55 (H2N1S1), 852.50 (H4N1), 893.00 (H3N2), 1258.46 (…
40	29.1 (Cmpd 1777)		5	5	2	0	2355.97	1178.49	785.99	n.d.	1178.42	786	441.38 (N1-PROC), 587.51 (N1F1-PROC), 644.33 (N2-PROC), 806.00 (H1N2-PROC), 1009.88 (H1N3-PROC), 1171.70 (H2N3-PROC), 1276.63 (H3N2F1-PROC), 1317.50 (H2N3F1-PROC), 1333.68 (H3N3-PROC), 1479.70 (H3N3F1-PROC), 1495.51 (H4N3-PROC), 1625.69 (H3N3F2-PROC), 1641.89 (H4N3F1-PROC), 1787.75 (H4N3F2-PROC); 366.06 (H1N1), 512.14 (H1N1F1), 528.09 (H2N1), 569.38 (H1N2), 690.13 (H3N1), 731.08 (H2N2), 836.26 (H…
41	29.3 (Cmpd 1786)		5	4	1	1	2297.93	1149.47	766.65	n.d.	1149.48	766.64	441.20 (N1-PROC), 587.30 (N1F1-PROC), 644.40 (N2-PROC), 790.32 (N2F1-PROC), 806.45 (H1N2-PROC), 952.42 (H1N2F1-PROC), 968.45 (H2N2-PROC), 1114.56 (H2N2F1-PROC), 1130.58 (H3N2-PROC), 1171.63 (H2N3-PROC), 1276.65 (H3N2F1-PROC), 1317.50 (H2N3F1-PROC), 1333.55 (H3N3-PROC), 1479.42 (H3N3F1-PROC), 1495.65 (H4N3-PROC), 1641.70 (H4N3F1-PROC); 292.07 (S1), 325.11 (H2), 366.11 (H1N1), 454.13 (H1S1), 528.24…
42	29.5 (Cmpd 1799)		6	3	0	1	2110.84	1055.92	704.28	n.d.	1055.88	704.3	441.25 (N1-PROC), 644.19 (N2-PROC), 806.34 (H1N2-PROC), 968.51 (H2N2-PROC), 1130.57 (H3N2-PROC), 1292.65 (H4N2-PROC), 1454.63 (H5N2-PROC); 203.97 (N1), 291.96 (S1), 325.10 (H2), 366.14 (H1N1), 454.13 (H1S1), 487.27 (H3), 528.17 (H2N1), 649.15 (H4), 657.23 (H1N1S1), 690.20 (H3N1), 819.31 (H2N1S1), 852.30 (H4N1), 893.28 (H3N2), 981.29 (H3N1S1), 1014.32 (H5N1), 1143.46 (H4N1S1), 1217.40 (H5N2), 1305…
43	30 (Cmpd 1832)		5	5	1	1	2501.01	1251.01	834.34	n.d.	1250.98	834.35	441.26 (N1-PROC), 587.33 (N1F1-PROC), 644.40 (N2-PROC), 806.26 (H1N2-PROC), 968.53 (H2N2-PROC), 1009.70 (H1N3-PROC), 1114.48 (H2N2F1-PROC), 1155.51 (H1N3F1-PROC), 1171.60 (H2N3-PROC), 1276.74 (H3N2F1-PROC), 1317.69 (H2N3F1-PROC), 1333.61 (H3N3-PROC), 1479.70 (H3N3F1-PROC), 1536.88 (H3N4-PROC), 1641.77 (H4N3F1-PROC), 1770.88 (H3N3S1F1-PROC), 1844.83 (H4N4F1-PROC), 1932.67 (H4N3S1F1-PROC); 292.04 (…
44	30.2 (Cmpd 1840)		8	2	0	0	1940.77	970.89	647.6	n.d.	970.88	647.61	441.28 (N1-PROC), 644.36 (N2-PROC), 806.41 (H1N2-PROC), 1130.59 (H3N2-PROC), 1292.62 (H4N2-PROC); 325.09 (H2), 366.17 (H1N1), 486.94 (H3), 528.13 (H2N1), 649.20 (H4), 690.22 (H3N1), 811.25 (H5), 852.32 (H4N1), 1014.38 (H5N1), 1176.43 (H6N1), 1338.49 (H7N1), 1500.53 (H8N1).
45	30.5 (Cmpd 1852)		6	3	1	0	2371.96	1186.48	791.33	n.d.	n.d.	791.32	441.36 (N1-PROC), 587.37 (N1F1-PROC), 644.38 (N2-PROC), 806.38 (H1N2-PROC), 1114.59 (H2N2F1-PROC), 1276.38 (H3N2F1-PROC), 1333.63 (H3N3-PROC), 1479.64 (H3N3F1-PROC), 1495.86 (H4N3-PROC), 1641.75 (H4N3F1-PROC); 366.12 (H1N1), 528.17 (H2N1), 690.38 (H3N1), 731.13 (H2N2), 852.25 (H4N1), 893.29 (H3N2), 1055.38 (H4N2), 1420.54 (H5N3).
46	30.7 (Cmpd 1875)		6	4	0	1	2313.92	1157.46	771.98	n.d.	n.d.	771.98	441.21 (N1-PROC), 806.40 (H1N2-PROC), 968.41 (H2N2-PROC), 1130.58 (H3N2-PROC), 1333.63 (H3N3-PROC), 1495.67 (H4N3-PROC); 292.07 (S1), 325.25 (H2), 366.11 (H1N1), 528.22 (H2N1), 657.16 (H1N1S1), 731.26 (H2N2), 819.14 (H2N1S1), 893.26 (H3N2), 981.46 (H3N1S1), 1055.41 (H4N2).
47	31 (Cmpd 1891)		5	4	3	0	2298.95	1149.98	766.99	n.d.	1149.95	766.99	441.34 (N1-PROC), 587.35 (N1F1-PROC), 644.29 (N2-PROC), 806.75 (H1N2-PROC), 952.42 (H1N2F1-PROC), 968.50 (H2N2-PROC), 1114.56 (H2N2F1-PROC), 1130.64 (H3N2-PROC), 1276.63 (H3N2F1-PROC), 1479.55 (H3N3F1-PROC), 1495.50 (H4N3-PROC); 350.21 (N1F1), 366.11 (H1N1), 512.18 (H1N1F1), 528.16 (H2N1), 674.27 (H2N1F1), 690.50 (H3N1), 731.31 (H2N2), 893.56 (H3N2), 1039.40 (H3N2F1), 1055.41 (H4N2), 1185.63 (H3N…
48	31.1 (Cmpd 1898)		5	4	1	2	2589.02	1295.01	863.68	n.d.	1295.01	863.69	441.36 (N1-PROC), 644.31 (N2-PROC), 806.25 (H1N2-PROC), 968.44 (H2N2-PROC), 1130.55 (H3N2-PROC), 1171.63 (H2N3-PROC), 1317.63 (H2N3F1-PROC), 1333.67 (H3N3-PROC), 1479.69 (H3N3F1-PROC), 1495.65 (H4N3-PROC), 1536.75 (H3N4-PROC), 1641.74 (H4N3F1-PROC), 1786.76 (H4N3S1-PROC), 1932.86 (H4N3S1F1-PROC); 292.07 (S1), 366.10 (H1N1), 454.16 (H1S1), 512.04 (H1N1F1), 528.17 (H2N1), 657.23 (H1N1S1), 674.63 (H…
49	31.2 (Cmpd 1901)		5	4	3	1	2590.04	1295.52	864.02	n.d.	1295.44	864.04	441.23 (N1-PROC), 587.33 (N1F1-PROC), 644.27 (N2-PROC), 790.45 (N2F1-PROC), 806.29 (H1N2-PROC), 952.47 (H1N2F1-PROC), 968.44 (H2N2-PROC), 1114.52 (H2N2F1-PROC), 1130.58 (H3N2-PROC), 1276.65 (H3N2F1-PROC), 1317.53 (H2N3F1-PROC), 1333.71 (H3N3-PROC), 1479.81 (H3N3F1-PROC), 1495.60 (H4N3-PROC), 1624.63 (H3N3S1-PROC), 1641.69 (H4N3F1-PROC), 1787.88 (H4N3F2-PROC), 1932.81 (H4N3S1F1-PROC); 292.06 (S1),…
50	31.4 (Cmpd 1914)		5	5	3	0	2502.03	1251.52	834.68	n.d.	n.d.	834.7	441.37 (N1-PROC), 587.35 (N1F1-PROC), 806.25 (H1N2-PROC), 1130.63 (H3N2-PROC), 1276.75 (H3N2F1-PROC), 1317.56 (H2N3F1-PROC), 1333.73 (H3N3-PROC), 1479.69 (H3N3F1-PROC), 1625.68 (H3N3F2-PROC), 1641.63 (H4N3F1-PROC), 1771.84 (H3N3F3-PROC), 1787.74 (H4N3F2-PROC); 309.25 (H1F1), 325.24 (H2), 366.14 (H1N1), 487.00 (H3), 512.18 (H1N1F1), 528.01 (H2N1), 569.13 (H1N2), 658.19 (H1N1F2), 674.25 (H2N1F1), 7…
51	31.5 (Cmpd 1921)		5	4	0	2	2442.96	1221.99	814.99	n.d.	1221.98	815	441.22 (N1-PROC), 644.34 (N2-PROC), 806.46 (H1N2-PROC), 968.47 (H2N2-PROC), 1130.55 (H3N2-PROC), 1333.68 (H3N3-PROC), 1495.65 (H4N3-PROC), 1786.78 (H4N3S1-PROC); 292.21 (S1), 325.13 (H2), 366.17 (H1N1), 454.24 (H1S1), 528.17 (H2N1), 657.20 (H1N1S1), 690.13 (H3N1), 731.25 (H2N2), 893.26 (H3N2), 981.13 (H3N1S1), 1055.38 (H4N2), 1143.38 (H4N1S1), 1184.49 (H3N2S1), 1346.42 (H4N2S1), 1420.50 (H5N3), 1…
52	31.6 (Cmpd 1928)		5	5	1	2	2792.1	1396.55	931.37	n.d.	n.d.	931.36	441.31 (N1-PROC), 587.32 (N1F1-PROC), 644.35 (N2-PROC), 806.36 (H1N2-PROC), 968.55 (H2N2-PROC), 1130.65 (H3N2-PROC), 1155.49 (H1N3F1-PROC), 1171.60 (H2N3-PROC), 1276.80 (H3N2F1-PROC), 1317.66 (H2N3F1-PROC), 1333.64 (H3N3-PROC), 1479.64 (H3N3F1-PROC), 1495.75 (H4N3-PROC), 1520.89 (H2N4F1-PROC), 1770.72 (H3N3S1F1-PROC); 292.03 (S1), 366.18 (H1N1), 454.17 (H1S1), 528.17 (H2N1), 657.19 (H1N1S1), 690.…
53	31.8 (Cmpd 1939)		5	4	2	1	2443.98	1222.5	815.33	n.d.	1222.44	815.35	441.30 (N1-PROC), 587.31 (N1F1-PROC), 644.41 (N2-PROC), 806.21 (H1N2-PROC), 952.54 (H1N2F1-PROC), 968.40 (H2N2-PROC), 1114.59 (H2N2F1-PROC), 1130.54 (H3N2-PROC), 1276.61 (H3N2F1-PROC), 1333.55 (H3N3-PROC), 1479.75 (H3N3F1-PROC), 1495.62 (H4N3-PROC), 1641.56 (H4N3F1-PROC), 1787.82 (H4N3F2-PROC); 292.13 (S1), 350.25 (N1F1), 366.11 (H1N1), 454.17 (H1S1), 512.19 (H1N1F1), 528.12 (H2N1), 657.22 (H1N1S…
54	32 (Cmpd 1950)		6	5	1	1	2663.06	1332.03	888.36	n.d.	n.d.	888.37	441.19 (N1-PROC), 587.25 (N1F1-PROC), 644.15 (N2-PROC), 790.51 (N2F1-PROC), 806.13 (H1N2-PROC), 1114.63 (H2N2F1-PROC), 1171.75 (H2N3-PROC), 1276.52 (H3N2F1-PROC), 1333.50 (H3N3-PROC), 1479.66 (H3N3F1-PROC), 1495.63 (H4N3-PROC), 1641.74 (H4N3F1-PROC), 1770.63 (H3N3S1F1-PROC), 1844.64 (H4N4F1-PROC), 1932.89 (H4N3S1F1-PROC), 2006.90 (H5N4F1-PROC); 291.89 (S1), 366.09 (H1N1), 454.17 (H1S1), 528.13 (H…
55	32.4 (Cmpd 1972)		9	2	0	0	2102.82	1051.92	701.61	n.d.	1051.91	701.62	441.30 (N1-PROC), 644.33 (N2-PROC), 806.45 (H1N2-PROC), 968.45 (H2N2-PROC), 1130.57 (H3N2-PROC), 1292.56 (H4N2-PROC), 1454.68 (H5N2-PROC), 1616.75 (H6N2-PROC); 325.09 (H2), 366.07 (H1N1), 486.80 (H3), 527.98 (H2N1), 649.10 (H4), 690.28 (H3N1), 811.42 (H5), 852.30 (H4N1), 973.35 (H6), 1014.35 (H5N1), 1135.39 (H7), 1176.44 (H6N1), 1338.53 (H7N1), 1500.49 (H8N1), 1662.58 (H9N1).
56	32.6 (Cmpd 1989)		5	4	1	2	2589.02	1295.01	863.68	n.d.	n.d.	863.7	441.22 (N1-PROC), 587.28 (N1F1-PROC), 644.46 (N2-PROC), 790.50 (N2F1-PROC), 806.42 (H1N2-PROC), 952.41 (H1N2F1-PROC), 968.43 (H2N2-PROC), 1114.62 (H2N2F1-PROC), 1130.53 (H3N2-PROC), 1171.75 (H2N3-PROC), 1276.58 (H3N2F1-PROC), 1479.63 (H3N3F1-PROC), 1495.38 (H4N3-PROC), 1641.90 (H4N3F1-PROC), 1770.51 (H3N3S1F1-PROC), 1786.63 (H4N3S1-PROC), 1932.88 (H4N3S1F1-PROC); 366.13 (H1N1), 528.09 (H2N1), 657…
57	32.9 (Cmpd 2002)		6	5	2	0	2518.02	1259.51	840.01	n.d.	n.d.	840.04	587.43 (N1F1-PROC), 790.75 (N2F1-PROC), 952.50 (H1N2F1-PROC), 1114.61 (H2N2F1-PROC), 1317.02 (H2N3F1-PROC), 1479.45 (H3N3F1-PROC), 1495.75 (H4N3-PROC), 1625.75 (H3N3F2-PROC), 1641.71 (H4N3F1-PROC), 1787.78 (H4N3F2-PROC), 1828.75 (H3N4F2-PROC); 325.14 (H2), 366.10 (H1N1), 512.21 (H1N1F1), 528.14 (H2N1), 674.38 (H2N1F1), 877.38 (H2N2F1), 893.13 (H3N2), 1055.38 (H4N2), 1217.42 (H5N2), 1258.50 (H4N3)…
58	32.9 (Cmpd 2006)		6	5	3	0	2664.08	1332.54	888.7	n.d.	n.d.	888.7	441.13 (N1-PROC), 644.25 (N2-PROC), 790.02 (N2F1-PROC), 806.00 (H1N2-PROC), 968.38 (H2N2-PROC), 1114.66 (H2N2F1-PROC), 1130.45 (H3N2-PROC), 1276.45 (H3N2F1-PROC), 1479.66 (H3N3F1-PROC), 1495.64 (H4N3-PROC), 1641.82 (H4N3F1-PROC), 1682.75 (H3N4F1-PROC), 1787.63 (H4N3F2-PROC), 2007.13 (H5N4F1-PROC); 366.16 (H1N1), 512.16 (H1N1F1), 569.26 (H1N2), 731.35 (H2N2), 852.50 (H4N1), 877.13 (H2N2F1), 1039.2…
59	33 (Cmpd 2008)		5	5	1	2	2792.1	1396.55	931.37	n.d.	n.d.	931.39	441.32 (N1-PROC), 644.35 (N2-PROC), 806.41 (H1N2-PROC), 968.50 (H2N2-PROC), 1009.55 (H1N3-PROC), 1130.50 (H3N2-PROC), 1171.59 (H2N3-PROC), 1317.70 (H2N3F1-PROC), 1333.70 (H3N3-PROC), 1479.80 (H3N3F1-PROC), 1495.72 (H4N3-PROC), 1624.63 (H3N3S1-PROC), 1641.84 (H4N3F1-PROC), 1682.81 (H3N4F1-PROC), 1786.75 (H4N3S1-PROC), 1844.92 (H4N4F1-PROC), 1932.65 (H4N3S1F1-PROC), 1989.70 (H4N4S1-PROC), 2135.86 (…
60	33.4 (Cmpd 2032)		6	4	1	1	2663.06	1332.03	888.36	n.d.	n.d.	888.37	441.25 (N1-PROC), 587.24 (N1F1-PROC), 790.00 (N2F1-PROC), 952.54 (H1N2F1-PROC), 968.38 (H2N2-PROC), 1114.41 (H2N2F1-PROC), 1130.88 (H3N2-PROC), 1276.38 (H3N2F1-PROC), 1333.63 (H3N3-PROC), 1479.50 (H3N3F1-PROC), 1495.65 (H4N3-PROC), 1641.57 (H4N3F1-PROC), 1786.93 (H4N3S1-PROC), 1932.88 (H4N3S1F1-PROC), 2006.51 (H5N4F1-PROC); 366.10 (H1N1), 454.13 (H1S1), 528.20 (H2N1), 569.12 (H1N2), 657.16 (H1N1S…
61	33.5 (Cmpd 2042)		6	5	0	2	2808.1	1404.55	936.7	n.d.	n.d.	936.69	441.39 (N1-PROC), 806.38 (H1N2-PROC), 968.47 (H2N2-PROC), 1333.69 (H3N3-PROC), 1495.72 (H4N3-PROC), 1698.75 (H4N4-PROC), 1786.78 (H4N3S1-PROC), 1989.88 (H4N4S1-PROC), 2151.96 (H5N4S1-PROC); 325.25 (H2), 366.09 (H1N1), 454.00 (H1S1), 528.14 (H2N1), 657.17 (H1N1S1), 690.38 (H3N1), 819.26 (H2N1S1), 893.29 (H3N2), 1022.50 (H2N2S1), 1184.38 (H3N2S1), 1346.38 (H4N2S1), 1420.25 (H5N3), 1475.63 (H3N2S1),…
62	33.9 (Cmpd 2062)		7	6	1	0	2737.09	1369.05	913.04	n.d.	1368.91	913.04	587.41 (N1F1-PROC), 790.42 (N2F1-PROC), 952.38 (H1N2F1-PROC), 968.51 (H2N2-PROC), 1114.74 (H2N2F1-PROC), 1130.13 (H3N2-PROC), 1317.50 (H2N3F1-PROC), 1333.50 (H3N3-PROC), 1479.67 (H3N3F1-PROC), 1641.77 (H4N3F1-PROC), 1844.87 (H4N4F1-PROC), 1860.75 (H5N4-PROC), 2006.91 (H5N4F1-PROC); 366.10 (H1N1), 528.28 (H2N1), 731.25 (H2N2), 893.13 (H3N2), 934.63 (H2N3), 1785.51 (H6N4).
63	34.2 (Cmpd 2084)		7	7	1	0	2940.17	1470.59	980.73	n.d.	n.d.	980.72	441.25 (N1-PROC), 587.25 (N1F1-PROC), 644.38 (N2-PROC), 790.42 (N2F1-PROC), 806.41 (H1N2-PROC), 1682.89 (H3N4F1-PROC), 1698.63 (H4N4-PROC), 1844.76 (H4N4F1-PROC), 2006.88 (H5N4F1-PROC), 2047.97 (H4N5F1-PROC), 2063.97 (H5N5-PROC), 2209.93 (H5N5F1-PROC); 325.25 (H2), 366.14 (H1N1), 528.06 (H2N1), 893.40 (H3N2), 1096.26 (H3N3), 1420.50 (H5N3), 1623.72 (H5N4), 1664.13 (H4N5), 1988.74 (H6N5).
64	34.6 (Cmpd 2104)		6	5	3	1	2955.17	1478.1	985.73	n.d.	n.d.	985.7	441.28 (N1-PROC), 587.14 (N1F1-PROC), 790.50 (N2F1-PROC), 952.63 (H1N2F1-PROC), 968.38 (H2N2-PROC), 1114.38 (H2N2F1-PROC), 1276.50 (H3N2F1-PROC), 1333.51 (H3N3-PROC), 1479.70 (H3N3F1-PROC), 1495.75 (H4N3-PROC), 1641.73 (H4N3F1-PROC), 1682.63 (H3N4F1-PROC), 1770.63 (H3N3S1F1-PROC), 1786.75 (H4N3S1-PROC), 1787.75 (H4N3F2-PROC), 1932.75 (H4N3S1F1-PROC); 292.06 (S1), 366.03 (H1N1), 454.00 (H1S1), 512…
65	34.9 (Cmpd 2127)		6	5	2	1	2809.12	1405.06	937.04	n.d.	n.d.	937.1	441.25 (N1-PROC), 587.44 (N1F1-PROC), 790.63 (N2F1-PROC), 952.51 (H1N2F1-PROC), 968.25 (H2N2-PROC), 1114.50 (H2N2F1-PROC), 1479.65 (H3N3F1-PROC), 1495.72 (H4N3-PROC), 1626.00 (H3N3F2-PROC), 1641.68 (H4N3F1-PROC), 1787.82 (H4N3F2-PROC), 1932.72 (H4N3S1F1-PROC), 2006.63 (H5N4F1-PROC), 2079.11 (H4N3S1F2-PROC); 366.11 (H1N1), 487.50 (H3), 512.06 (H1N1F1), 657.19 (H1N1S1), 674.13 (H2N1F1), 731.38 (H2N…
66	35.0 (Cmpd 2131)		7	6	1	1	3028.19	1514.6	1010.07	n.d.	n.d.	1010.04	587.38 (N1F1-PROC), 790.51 (N2F1-PROC), 1114.75 (H2N2F1-PROC), 1333.88 (H3N3-PROC), 1479.82 (H3N3F1-PROC), 1495.51 (H4N3-PROC), 1641.63 (H4N3F1-PROC), 1844.88 (H4N4F1-PROC), 1860.89 (H5N4-PROC), 2006.84 (H5N4F1-PROC), 2135.75 (H4N4S1F1-PROC), 2209.88 (H5N5F1-PROC), 2297.91 (H5N4S1F1-PROC), 2371.95 (H6N3F1-PROC); 366.06 (H1N1), 454.12 (H1S1), 528.00 (H2N1), 657.19 (H1N1S1), 819.88 (H2N1S1), 852.50…
67	35.0 (Cmpd 2132)		6	5	1	2	2954.15	1477.58	985.39	n.d.	n.d.	985.36	441.50 (N1-PROC), 968.13 (H2N2-PROC), 1130.88 (H3N2-PROC), 1317.50 (H2N3F1-PROC), 1333.63 (H3N3-PROC), 1479.76 (H3N3F1-PROC), 1641.71 (H4N3F1-PROC), 1770.75 (H3N3S1F1-PROC), 1844.78 (H4N4F1-PROC), 1932.85 (H4N3S1F1-PROC), 2297.83 (H5N4S1F1-PROC), 2792.26 (H5N5S2F1-PROC); 292.08 (S1), 366.07 (H1N1), 512.25 (H1N1F1), 528.13 (H2N1), 657.15 (H1N1S1), 731.38 (H2N2), 836.76 (H3N1F1), 965.72 (H2N1S1F1),…
68	35.1 (Cmpd 2135)		6	5	3	1	2955.17	1478.1	985.73	n.d.	n.d.	985.71	441.25 (N1-PROC), 587.43 (N1F1-PROC), 644.25 (N2-PROC), 806.62 (H1N2-PROC), 1114.63 (H2N2F1-PROC), 1130.64 (H3N2-PROC), 1276.63 (H3N2F1-PROC), 1479.75 (H3N3F1-PROC), 1495.68 (H4N3-PROC), 1641.76 (H4N3F1-PROC), 1770.75 (H3N3S1F1-PROC), 1786.88 (H4N3S1-PROC), 1787.77 (H4N3F2-PROC), 1932.90 (H4N3S1F1-PROC), 2006.75 (H5N4F1-PROC), 2226.01 (H6N5-PROC); 366.12 (H1N1), 512.00 (H1N1F1), 657.27 (H1N1S1), …
69	35.1 (Cmpd 2138)		6	5	0	3	3099.19	1550.1	1033.74	n.d.	n.d.	1033.72	441.20 (N1-PROC), 644.63 (N2-PROC), 806.47 (H1N2-PROC), 968.56 (H2N2-PROC), 1130.54 (H3N2-PROC), 1333.76 (H3N3-PROC), 1495.68 (H4N3-PROC), 1624.79 (H3N3S1-PROC), 1786.79 (H4N3S1-PROC), 1989.88 (H4N4S1-PROC), 2151.73 (H5N4S1-PROC); 292.07 (S1), 325.13 (H2), 366.08 (H1N1), 454.03 (H1S1), 528.25 (H2N1), 657.24 (H1N1S1), 731.50 (H2N2), 819.28 (H2N1S1), 852.25 (H4N1), 893.38 (H3N2), 934.00 (H2N3), 105…
70	36 (Cmpd 2186)		7	6	2	0	2883.15	1442.08	961.72	n.d.	n.d.	961.73	441.25 (N1-PROC), 644.38 (N2-PROC), 790.38 (N2F1-PROC), 952.00 (H1N2F1-PROC), 1114.12 (H2N2F1-PROC), 1333.62 (H3N3-PROC), 1479.63 (H3N3F1-PROC), 1495.70 (H4N3-PROC), 1625.75 (H3N3F2-PROC), 1641.87 (H4N3F1-PROC), 1990.75 (H4N4F2-PROC), 2006.86 (H5N4F1-PROC), 2152.91 (H5N4F2-PROC); 366.09 (H1N1), 512.25 (H1N1F1), 731.25 (H2N2), 877.38 (H2N2F1), 934.75 (H2N3), 1039.25 (H3N2F1), 1201.88 (H4N2F1), 193…
71	36.2 (Cmpd 2203)		7	6	1	1	3028.19	1514.6	1010.07	n.d.	n.d.	1010.06	587.36 (N1F1-PROC), 790.50 (N2F1-PROC), 1276.75 (H3N2F1-PROC), 1333.63 (H3N3-PROC), 1479.66 (H3N3F1-PROC), 1641.68 (H4N3F1-PROC), 1932.88 (H4N3S1F1-PROC), 2006.72 (H5N4F1-PROC), 2047.88 (H4N5F1-PROC), 2297.98 (H5N4S1F1-PROC); 325.13 (H2), 366.17 (H1N1), 528.13 (H2N1), 657.21 (H1N1S1), 819.25 (H2N1S1), 852.50 (H4N1), 934.38 (H2N3), 981.25 (H3N1S1), 1022.47 (H2N2S1), 1184.00 (H3N2S1), 1387.50 (H3N3…
72	36.3 (Cmpd 2209)		6	5	0	3	3099.19	1550.1	1033.74	n.d.	n.d.	1033.72	441.19 (N1-PROC), 644.38 (N2-PROC), 806.39 (H1N2-PROC), 968.53 (H2N2-PROC), 1130.66 (H3N2-PROC), 1333.75 (H3N3-PROC), 1495.66 (H4N3-PROC), 1624.63 (H3N3S1-PROC), 1786.74 (H4N3S1-PROC), 2151.88 (H5N4S1-PROC); 291.88 (S1), 325.09 (H2), 366.12 (H1N1), 454.00 (H1S1), 528.05 (H2N1), 657.23 (H1N1S1), 690.75 (H3N1), 819.35 (H2N1S1), 893.13 (H3N2), 934.58 (H2N3), 1055.37 (H4N2), 1096.45 (H3N3), 1184.44 (…
73	36.5 (Cmpd 2216)		7	6	1	2	3319.29	1660.15	1107.1	n.d.	n.d.	1107.09	441.25 (N1-PROC), 806.00 (H1N2-PROC), 1333.57 (H3N3-PROC), 1479.71 (H3N3F1-PROC), 1641.75 (H4N3F1-PROC), 1786.88 (H4N3S1-PROC), 1844.63 (H4N4F1-PROC), 1932.50 (H4N3S1F1-PROC), 2006.77 (H5N4F1-PROC); 291.88 (S1), 325.13 (H2), 366.08 (H1N1), 512.27 (H1N1F1), 657.22 (H1N1S1), 674.88 (H2N1F1), 690.38 (H3N1), 715.97 (H1N2F1), 731.84 (H2N2), 877.99 (H2N2F1), 1184.63 (H3N2S1), 1258.50 (H4N3).
74	37.5 (Cmpd 2276)		7	6	1	2	3319.29	1660.15	1107.1	n.d.	n.d.	1107.1	968.63 (H2N2-PROC), 1130.44 (H3N2-PROC), 1333.50 (H3N3-PROC), 1495.75 (H4N3-PROC), 1624.63 (H3N3S1-PROC), 1932.88 (H4N3S1F1-PROC), 2298.13 (H5N4S1F1-PROC); 366.10 (H1N1), 512.13 (H1N1F1), 657.26 (H1N1S1), 690.25 (H3N1), 715.01 (H1N2F1), 731.21 (H2N2), 803.25 (H1N1S1F1), 852.25 (H4N1), 1022.38 (H2N2S1), 1201.25 (H4N2F1), 1420.51 (H5N3), 1475.52 (H3N2S1), 1840.77 (H4N3S2), 1931.89 (H6N4F1).
75	37.7 (Cmpd 2287)		7	6	1	3	3610.38	1805.69	1204.13	n.d.	n.d.	1204.11	587.37 (N1F1-PROC), 952.63 (H1N2F1-PROC), 968.50 (H2N2-PROC), 1114.75 (H2N2F1-PROC), 1276.38 (H3N2F1-PROC), 1333.06 (H3N3-PROC), 1479.70 (H3N3F1-PROC), 1641.72 (H4N3F1-PROC), 1770.75 (H3N3S1F1-PROC), 1860.75 (H5N4-PROC), 1932.79 (H4N3S1F1-PROC), 1989.76 (H4N4S1-PROC), 2006.95 (H5N4F1-PROC), 2297.88 (H5N4S1F1-PROC); 292.13 (S1), 366.08 (H1N1), 454.00 (H1S1), 528.26 (H2N1), 657.16 (H1N1S1), 731.50 …
76	38.1 (Cmpd 2314)		7	7	1	2	3522.36	1761.69	1174.79	n.d.	n.d.	1174.82	441.13 (N1-PROC), 1641.63 (H4N3F1-PROC), 1682.63 (H3N4F1-PROC), 1698.75 (H4N4-PROC), 1989.88 (H4N4S1-PROC), 2006.75 (H5N4F1-PROC), 2209.88 (H5N5F1-PROC), 2501.13 (H5N5S1F1-PROC); 292.08 (S1), 366.27 (H1N1), 657.27 (H1N1S1), 772.63 (H1N3), 803.25 (H1N1S1F1), 819.80 (H2N1S1), 852.75 (H4N1), 1127.38 (H3N1S1F1).
77	39.1 (Cmpd 2371)		7	6	1	4	3901.48	1951.24	1301.16	n.d.	n.d.	n.d.	441.36 (N1-PROC), 806.38 (H1N2-PROC), 1333.63 (H3N3-PROC), 1479.85 (H3N3F1-PROC), 1495.63 (H4N3-PROC), 1641.71 (H4N3F1-PROC), 1770.63 (H3N3S1F1-PROC), 1786.74 (H4N3S1-PROC), 1932.79 (H4N3S1F1-PROC), 2006.88 (H5N4F1-PROC), 2135.75 (H4N4S1F1-PROC), 2297.94 (H5N4S1F1-PROC), 2372.00 (H6N3F1-PROC), 2591.13 (H7N6-PROC); 292.00 (S1), 366.12 (H1N1), 657.21 (H1N1S1), 715.50 (H1N2F1), 803.35 (H1N1S1F1), 81…
78	40.0 (Cmpd 2427)		7	6	1	4	3901.48	1951.24	1301.16	n.d.	n.d.	n.d.	441.13 (N1-PROC), 806.13 (H1N2-PROC), 1479.77 (H3N3F1-PROC), 1641.63 (H4N3F1-PROC), 1770.88 (H3N3S1F1-PROC), 1932.86 (H4N3S1F1-PROC), 2006.75 (H5N4F1-PROC), 2297.86 (H5N4S1F1-PROC), 2589.13 (H5N4S2F1-PROC), 2590.97 (H7N6-PROC); 291.91 (S1), 365.96 (H1N1), 454.13 (H1S1), 512.13 (H1N1F1), 657.18 (H1N1S1), 819.38 (H2N1S1), 877.13 (H2N2F1), 893.38 (H3N2), 965.50 (H2N1S1F1), 1096.38 (H3N3), 1387.51 (H…

## Sheet: Table S3
Table S3. 57 immunoprecipitated glycoproteins with E selectin chimera in SW620 cell lines identified by mass spectrometry†. † From SW620Mock and SW620FUT6 cells extracted membrane proteins, four immunoprecipitations with E Ig chimera were performed and analysed by HPLC MS/MS. The present list shows the glycosylated‡ immunoprecipitated proteins with E selectin chimera identified in SW620 cell line…
Protein Name	Gene Name	UniProtKB entry	MW (kDa)	Exclusive Unique Peptide Count§								Total spectrum count (sum)§		Subcellular location‡
				E‑selectin ligand from SW620Mock				E‑selectin ligand from SW620FUT6				E‑selectin ligand from SW620Mock	E‑selectin ligand from SW620FUT6
				Exp. 1	Exp. 2	Exp. 3	Exp. 4	Exp. 1	Exp. 2	Exp. 3	Exp. 4
Ig gamma-3 chain C region (Fragment)	IGHG3	P01860 (IGHG3_HUMAN)	41	4	4	3	4	4	5	3	3	840	831	Cell membrane, secreted
Keratin, type II cytoskeletal 8	KRT8	P05787 (K2C8_HUMAN)	54	59	62	60	64	48	40	41	43	884	469	Cytoplasm, nucleus
Golgi apparatus protein 1	GLG1	Q92896 (GSLG1_HUMAN)	135	31	44	43	37	78	58	77	67	284	697	Golgi apparatus membrane
Ig gamma-2 chain C region	IGHG2	P01859 (IGHG2_HUMAN)	36	4	3	1	3	4	4	3	2	600	551	Cell membrane, secreted
Ig gamma-4 chain C region	IGHG4	P01861 (IGHG4_HUMAN)	36	3	3	4	5	3	3	4	3	434	424	Cell membrane, secreted
Keratin, type I cytoskeletal 18	KRT18	P05783 (K1C18_HUMAN)	48	46	49	43	51	30	29	21	22	485	145	Nucleus
Galectin-3-binding protein	LGALS3BP	Q08380 (LG3BP_HUMAN)	65	26	28	28	24	35	30	28	29	285	452	Secreted, extracellular matrix
Serum albumin	ALB	P02768 (ALBU_HUMAN)	69	8	7	15	33	10	40	13	15	235	216	Secreted
Vimentin	VIM	P08670 (VIME_HUMAN)	54	32	32	24	28	31	15	19	25	162	110	Cytoplasm, Cytoskeleton, Nucleus
Sortilin-related receptor	SORL1	Q92673 (SORL_HUMAN)	248	32	19	15	33	35	17	41	21	100	130	Endosome, Golgi apparatus, Membrane, Secreted
Sulfhydryl oxidase 2	QSOX2	Q6ZRP7 (QSOX2_HUMAN)	78	11	8	17	8	28	11	27	25	78	150	Cell/nucleus membrane, secreted
Integrin beta 4	ITGB4	P16144 (ITB4_HUMAN)	202	7	8	1	5	20	42	21	26	20	163	Cell membrane
Neutral amino acid transporter B(0)	SLC1A5	Q15758 (AAAT_HUMAN)	57	3	5	5	4	5	17	6	6	21	113	Cell membrane
Heat shock protein HSP 90-beta	HSP90AB1	P08238 (HS90B_HUMAN)	83	34	37	15	17	39	9	18	21	110	92	Cell membrane, Cytoplasm, Nucleus, Secreted
Heterogeneous nuclear ribonucleoprotein K	HNRNPK	P61978 (HNRPK_HUMAN)	51	21	18	15	16	19	2	14	21	102	78	Cytoplasm, nucleus
Neural cell adhesion molecule L1	L1CAM	P32004 (L1CAM_HUMAN)	140	0	0	0	0	31	20	30	27	0	118	Plasma membrane
Transferrin receptor protein 1	TFRC	P02786 (TFR1_HUMAN)	85	13	18	8	2	24	32	12	13	35	98	Cell membrane, secreted
4F2 cell-surface antigen heavy chain	SLC3A2	P08195 (4F2_HUMAN)	68	1	2	1	1	11	22	13	14	5	94	Cell membrane
Junction plakoglobin	JUP	P14923 (PLAK_HUMAN)	82	8	15	10	30	9	14	9	16	91	63	Cytoskeleton
Integrin alpha 6	ITGA6	P23229 (ITA6_HUMAN)	127	0	0	0	0	11	31	12	10	0	91	Plasma membrane
ATP synthase subunit beta, mitochondrial	ATP5F1B	P06576 (ATPB_HUMAN)	57	14	14	14	16	16	10	17	15	81	75	Mitochondrion membrane
ATP synthase subunit alpha, mitochondrial	ATP5F1A	P25705 (ATPA_HUMAN)	60	25	20	16	15	26	6	20	17	78	72	Cell/mitochondrion membrane
Desmoglein-1	DSG1	Q02413 (DSG1_HUMAN)	114	7	6	6	20	5	5	5	8	58	29	Cell membrane
Receptor-type tyrosine-protein phosphatase eta	PTPRJ	Q12913 (PTPRJ_HUMAN)	146	0	0	0	0	21	9	18	11	0	58	Plasma membrane
RNA-binding motif protein, X chromosome	RBMX	P38159 (RBMX_HUMAN)	42	7	29	5	12	9	8	3	3	48	22	Nucleus
Alpha-­1,6‑mannosyl-glycoprotein 6-beta-N-acetylglucosaminyl-transferase A	MGAT5	Q09328 (MGT5A_HUMAN)	85	3	3	1	2	14	11	6	5	5	42	Golgi apparatus membrane/secreted
DnaJ homolog subfamily C member 10	DNAJC10	Q8IXB1 (DJC10_HUMAN)	91	10	14	10	10	9	2	12	14	40	33	Endoplasmic reticulum lumen
Dipeptidase 1	DPEP1	P16444 (DPEP1_HUMAN)	46	10	9	5	6	8	2	6	7	40	27	Cell membrane
Integrin beta-1	ITGB1	P05556 (ITB1_HUMAN)	88	0	0	0	0	6	11	7	5	0	39	Plasma membrane, recycling endosome
UPF0378 protein KIAA0100	KIAA0100	Q14667 (K0100_HUMAN)	254	2	2	2	2	2	2	2	2	38	38	Secreted
Cation-independent mannose-6-phosphate receptor	IGF2R	P11717 (MPRI_HUMAN)	274	0	0	0	0	16	3	16	7	0	39	Lysosome membrane
N-acetylglucosamine-1-phosphotransferase subunits alpha/beta	GNPTAB	Q3T906 (GNPTA_HUMAN)	144	12	8	6	10	5	1	3	6	31	12	Golgi apparatus membrane
Polypeptide N-acetylgalactosaminyl-transferase 5	GALNT5	Q7Z7M9 (GALT5_HUMAN)	106	9	8	6	9	5	3	6	8	29	22	Golgi apparatus membrane
ATP-binding cassette sub-family D member 3	ABCD3	P28288 (ABCD3_HUMAN)	75	9	4	0	1	14	12	1	2	12	28	Peroxisome membrane
Endoplasmin	HSP90B1	P14625 (ENPL_HUMAN)	92	0	2	4	0	9	0	5	8	10	28	Endoplasmic reticulum lumen
Lysosome-associated membrane glycoprotein 1	LAMP1	P11279 (LAMP1_HUMAN)	45	0	0	0	1	4	6	6	5	1	28	Lysosome/endosome/cell membrane
Receptor-type tyrosine-protein phosphatase alpha	PTPRA	P18433 (PTPRA_HUMAN)	91	0	0	0	0	10	3	4	5	0	22	Membrane
Leucyl-cystinyl aminopeptidase	LNPEP	Q9UIQ6 (LCAP_HUMAN)	117	0	0	0	0	7	9	6	5	0	22	Plasma membrane/secreted
HLA class I histocompatibility antigen, A-23 alpha chain	HLA-A	P30447 (1A23_HUMAN)	41	2	3	1	1	7	4	5	4	7	21	Membrane
Prolactin-inducible protein	PIP	P12273 (PIP_HUMAN)	17	3	3	5	3	3	5	1	1	17	18	Secreted
Syndecan-1	SDC1	P18827 (SDC1_HUMAN)	32	1	0	1	2	2	2	4	5	3	18	Secreted, exosome, membrane
DNA replication licensing factor MCM7	MCM7	P33993 (MCM7_HUMAN)	81	6	8	2	2	2	0	0	4	17	4	Nucleus
Keratinocyte-associated transmembrane protein 2	KCT2	Q8NC54 (KCT2_HUMAN)	29	2	3	3	3	0	0	2	1	15	3	Membrane
Podocalyxin	PODXL	O00592 (PODXL_HUMAN)	59	3	2	0	0	4	4	4	3	5	13	Cell membrane
Ig gamma-1 chain C region	IGHA1	P01876 (IGHA1_HUMAN)	38	0	0	0	5	0	9	0	0	4	13	Cell membrane, secreted
Carboxypeptidase D	CPD	O75976 (CBPD_HUMAN)	153	0	0	0	0	2	0	6	6	0	13	Plasma membrane
Leukosialin	SPN	P16150 (LEUK_HUMAN)	40	1	0	1	1	2	2	2	2	2	12	Membrane, nucleus
Lysosome-associated membrane glycoprotein 2	LAMP2	P13473 (LAMP2_HUMAN)	45	0	0	0	0	3	3	3	3	0	12	Lysosome/endosome/plasma membrane
Serpin H1	SERPINH1	P50454 (SERPH_HUMAN)	46	3	4	1	3	2	2	1	1	10	6	Endoplasmic reticulum lumen
Cathepsin D	CTSD	P07339 (CATD_HUMAN)	45	2	0	1	6	0	0	1	0	8	0	Lysosome, secreted
CD109 antigen	CD109	Q6YHK3 (CD109_HUMAN)	162	0	0	0	0	3	2	2	4	0	8	Plasma membrane
Zinc-alpha-2-glycoprotein	AZGP1	P25311 (ZA2G_HUMAN)	34	3	0	1	2	1	3	2	1	7	7	Secreted
Golgi membrane protein 1	GOLM1	Q8NBJ4 (GOLM1_HUMAN)	45	0	0	0	0	2	2	2	4	0	7	Golgi apparatus membrane
Procollagen-lysine,2-oxoglutarate 5-dioxygenase 3	PLOD3	O60568 (PLOD3_HUMAN)	85	2	4	1	0	1	0	1	3	5	5	ER lumen/membrane, RER, Secreted
Heparan sulphate 2-O-sulfotransferase 1	HS2ST1	Q7LGA3 (HS2ST_HUMAN)	42	1	0	0	2	1	3	0	0	2	2	Golgi apparatus membrane
Plexin-D1	PLXND1	Q9Y4D7 (PLXD1_HUMAN)	212	0	0	0	0	2	0	1	4	0	4	Plasma membrane
Zymogen granule protein 16 homolog B	ZG16B	Q96DA0 (ZG16B_HUMAN)	23	0	0	0	0	0	2	0	2	0	4	Secreted
